# Supplementary material
Source: PubMed Central journal article supplement (PMC3771695)
Supplement: NIHMS479348-supplement-Supplemental_Data.pdf [file NIHMS479348-supplement-Supplemental_Data.pdf]

**Supplementary Figure 1:** QQ Plot of Association Statistics for the C-BCAC ER- GWAS. The observed versus expected score test statistics are shown for ~2.6M autosomal loci after QC exclusions and imputation to HapMap2 ( $\lambda=0.98$ ).

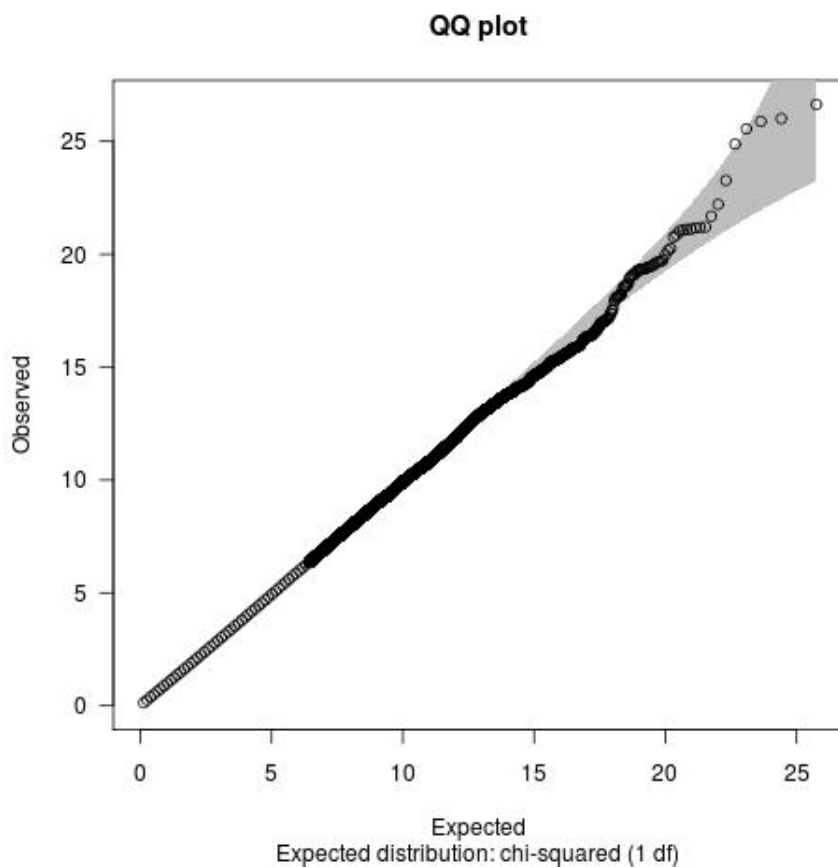

**Supplementary Figure 2:** Cluster plots for the normalized intensities of the two alleles, over all BCAC studies, for four SNPs achieving genome-wide significance.

**A. rs4245739 1q32.1/*MDM4***

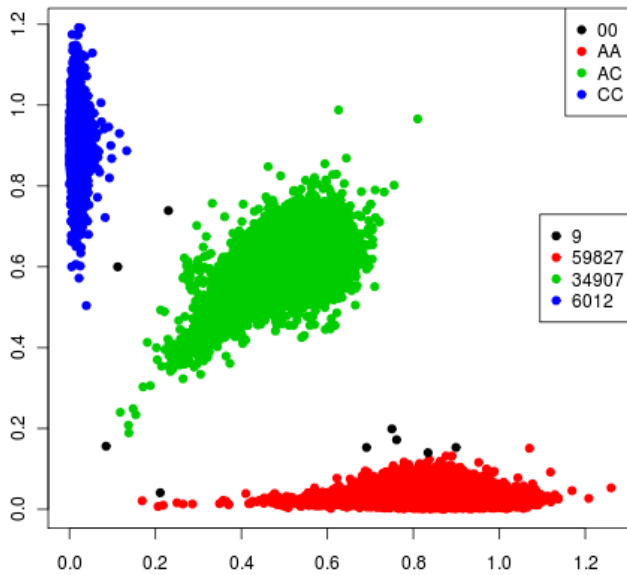

**B. rs6678914 1q32.1/*LGR6***

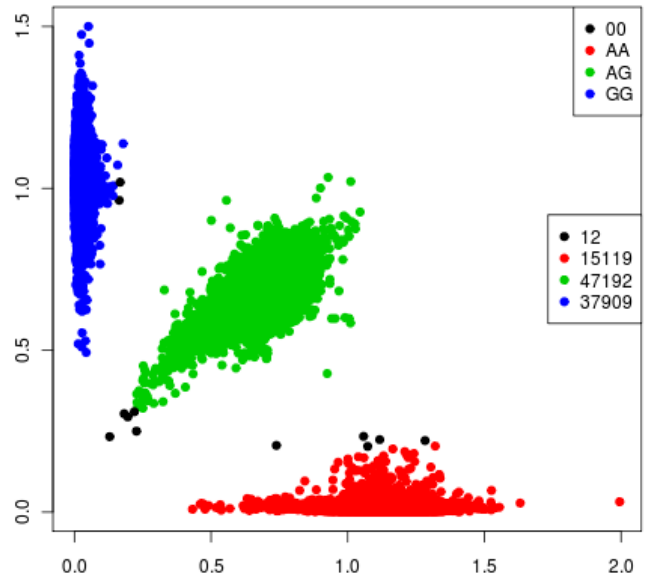

**C. rs12710696 2p24**

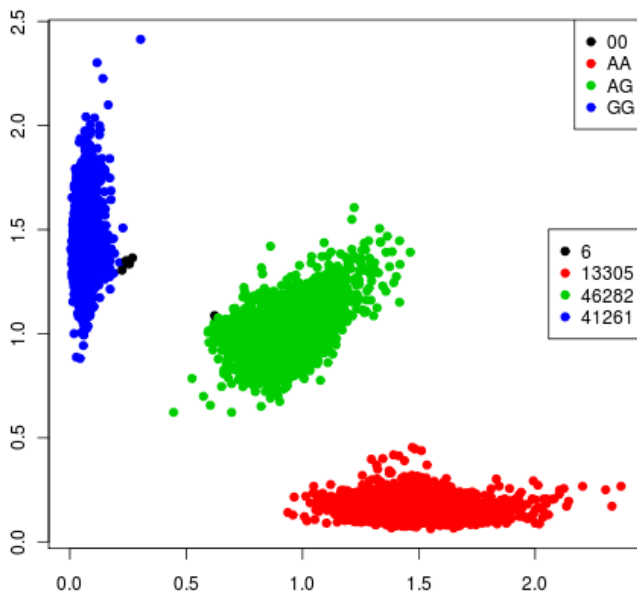

**D. rs11075995 6q12/*FTO***

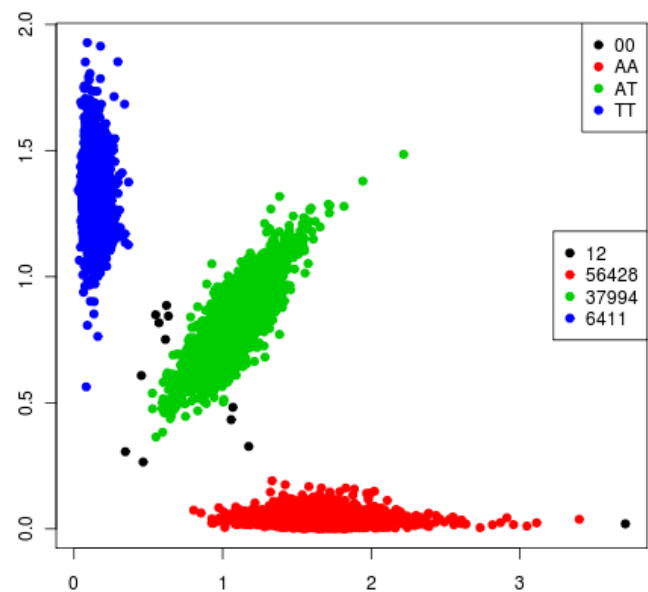

**Supplementary Figure 3:** Forest plots showing study-specific estimates and meta-analysis of ER-disease for 1q32.1/MDM4, 1q32.1/LGR6, 2p24 and 6q12.2/FTO loci in women of European ancestry. Black circles denote the estimated per-allele OR for the risk allele in Europeans. The horizontal lines denote 95% confidence limits. The area of the grey squares is inversely proportional to the variance of the estimate. The diamond denotes the estimated per-allele OR and overall CI from the combined analyses. Estimates from combined analyses differ slightly from those shown in Table 1 because of different software used.

**A. rs4245739 in 1q32.1/MDM4**

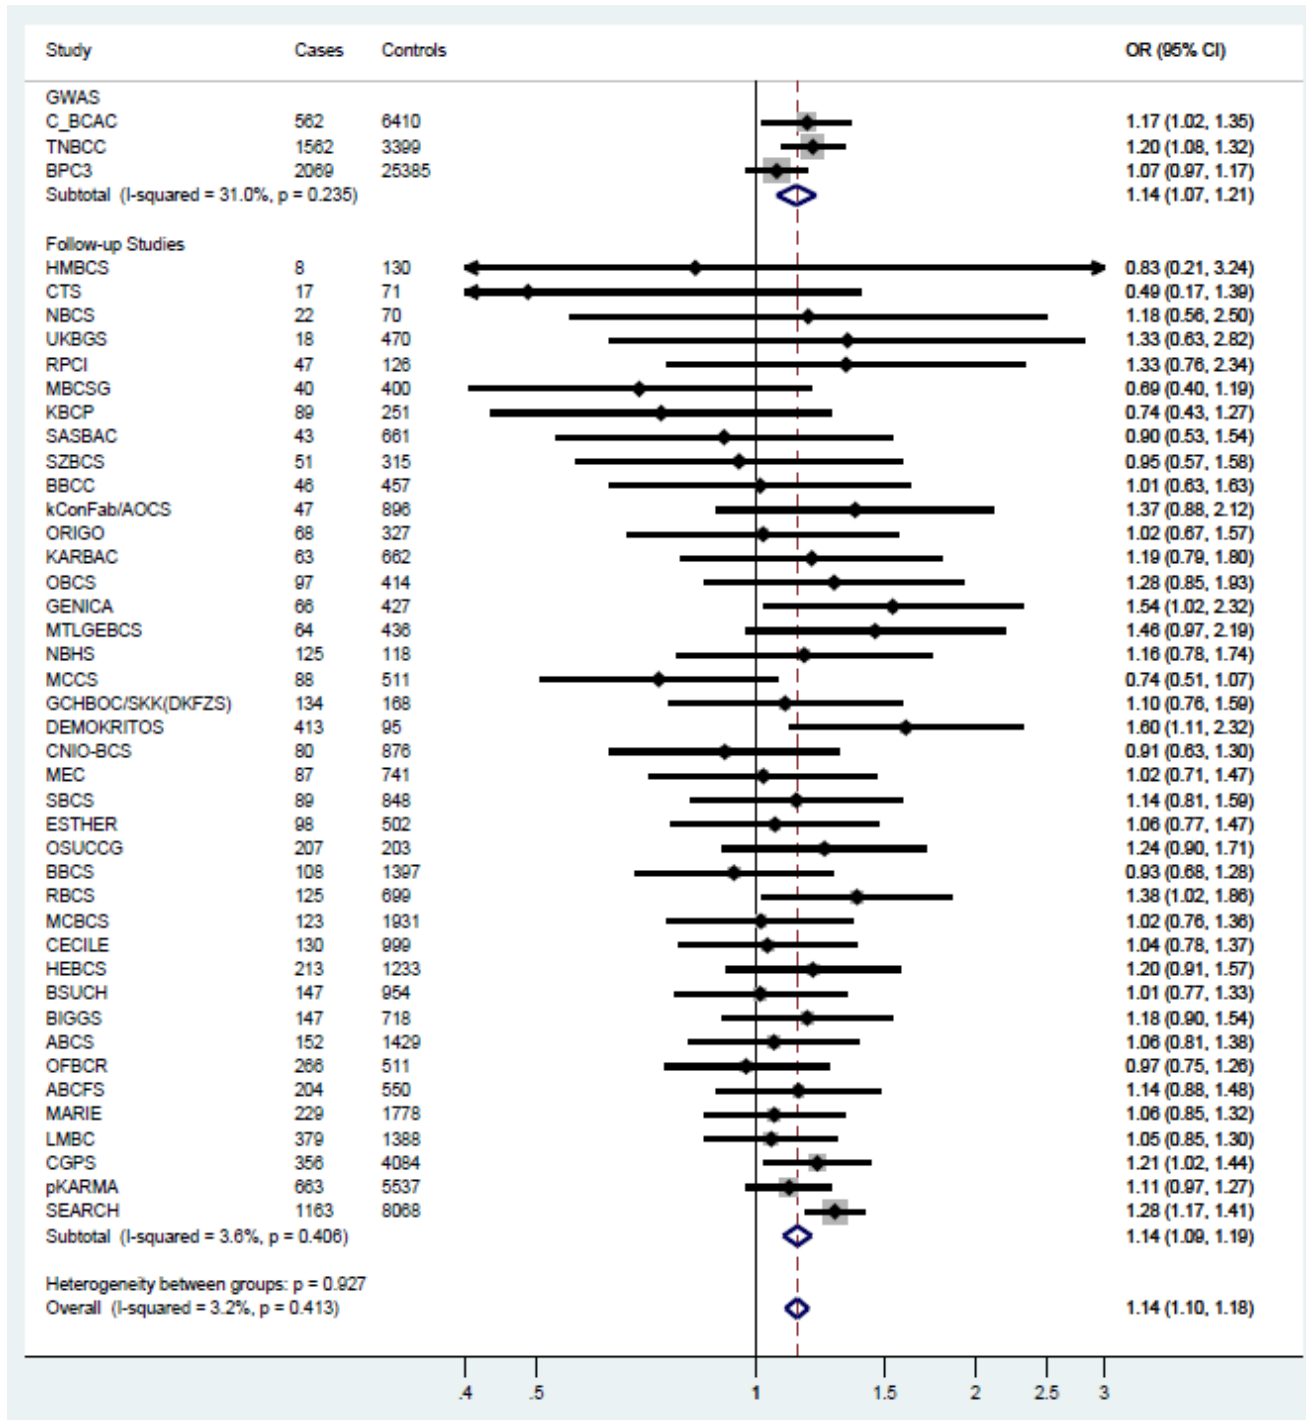

## B. rs6678914 in 1q32.1/LGR6

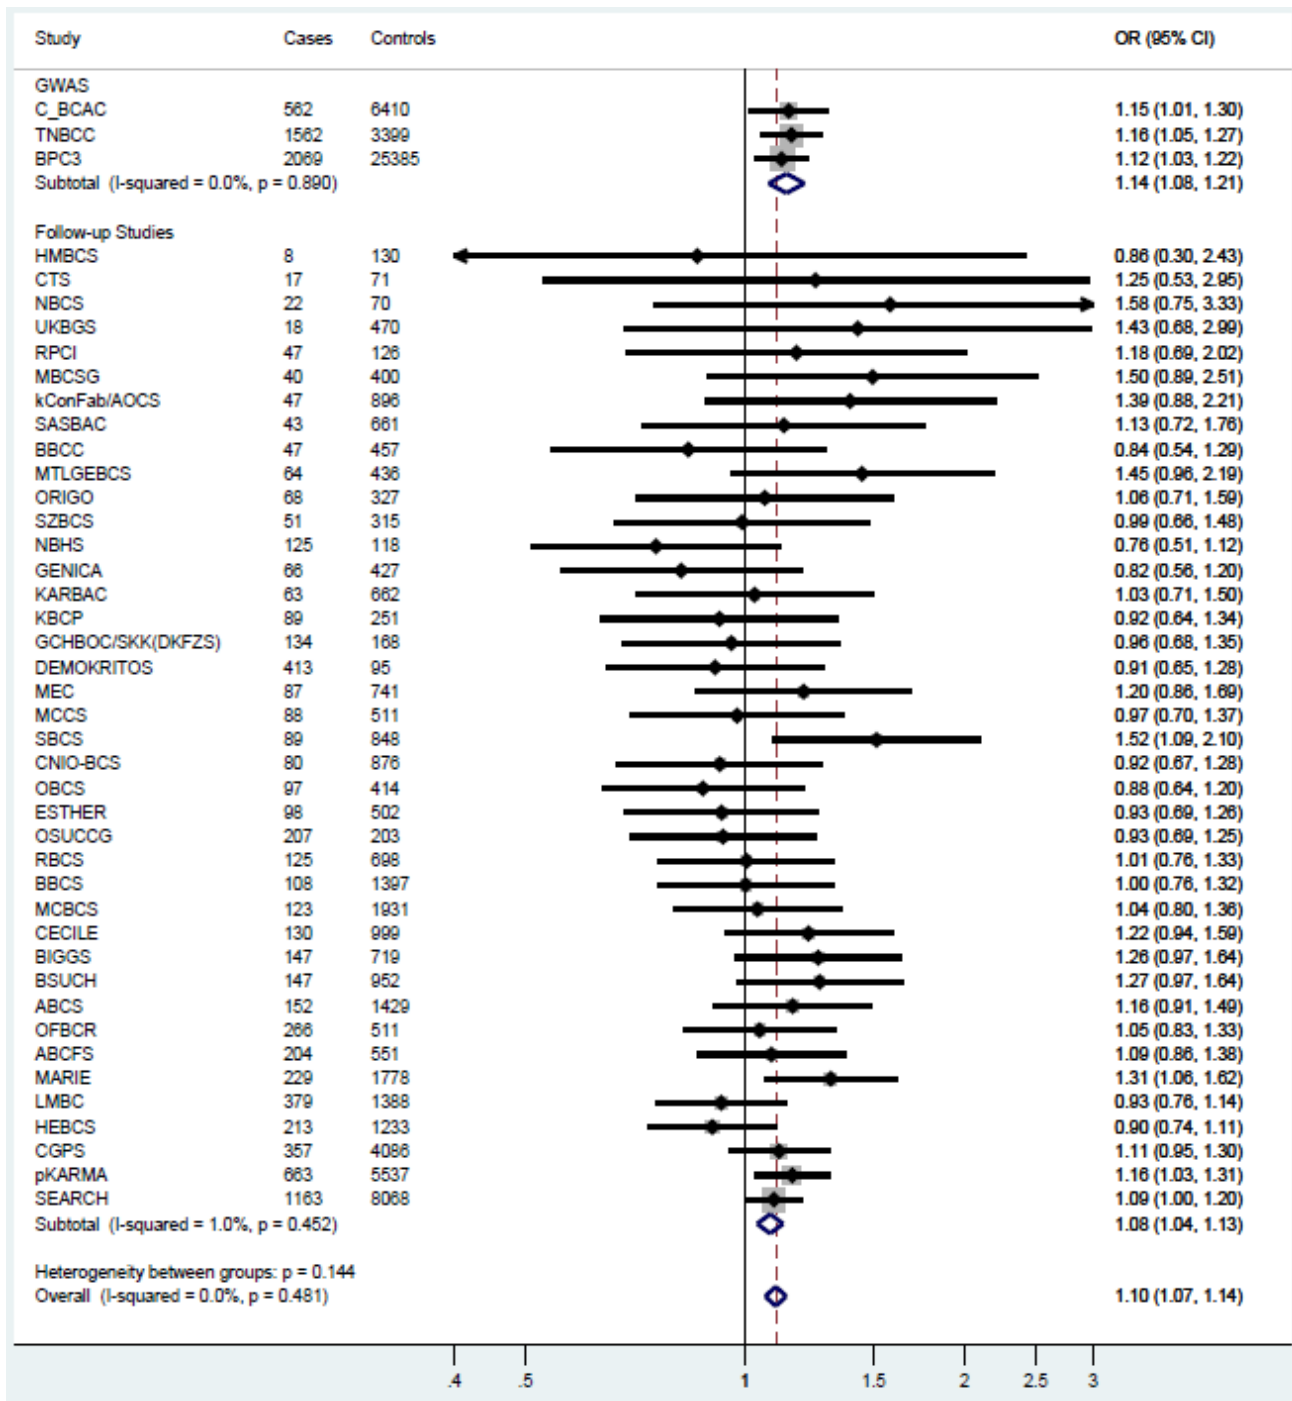

C. rs12710696 in 2p24

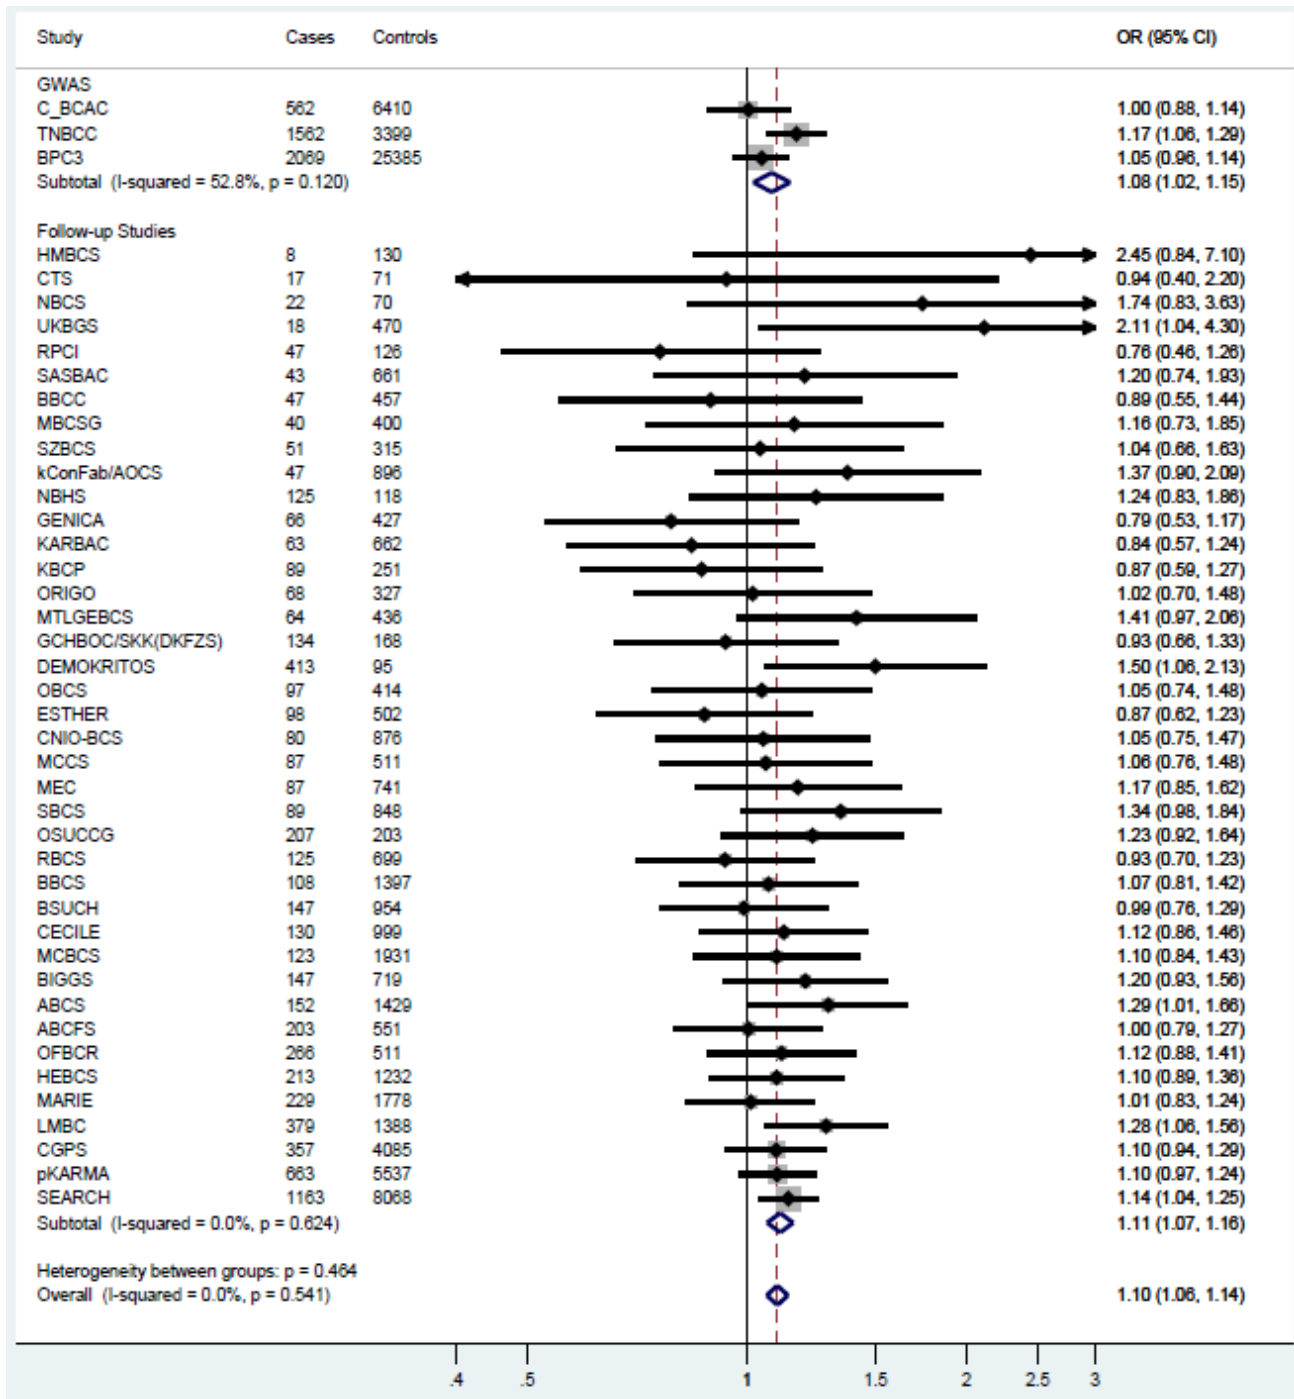

# D. rs11075995 in 6q12.2/FTO

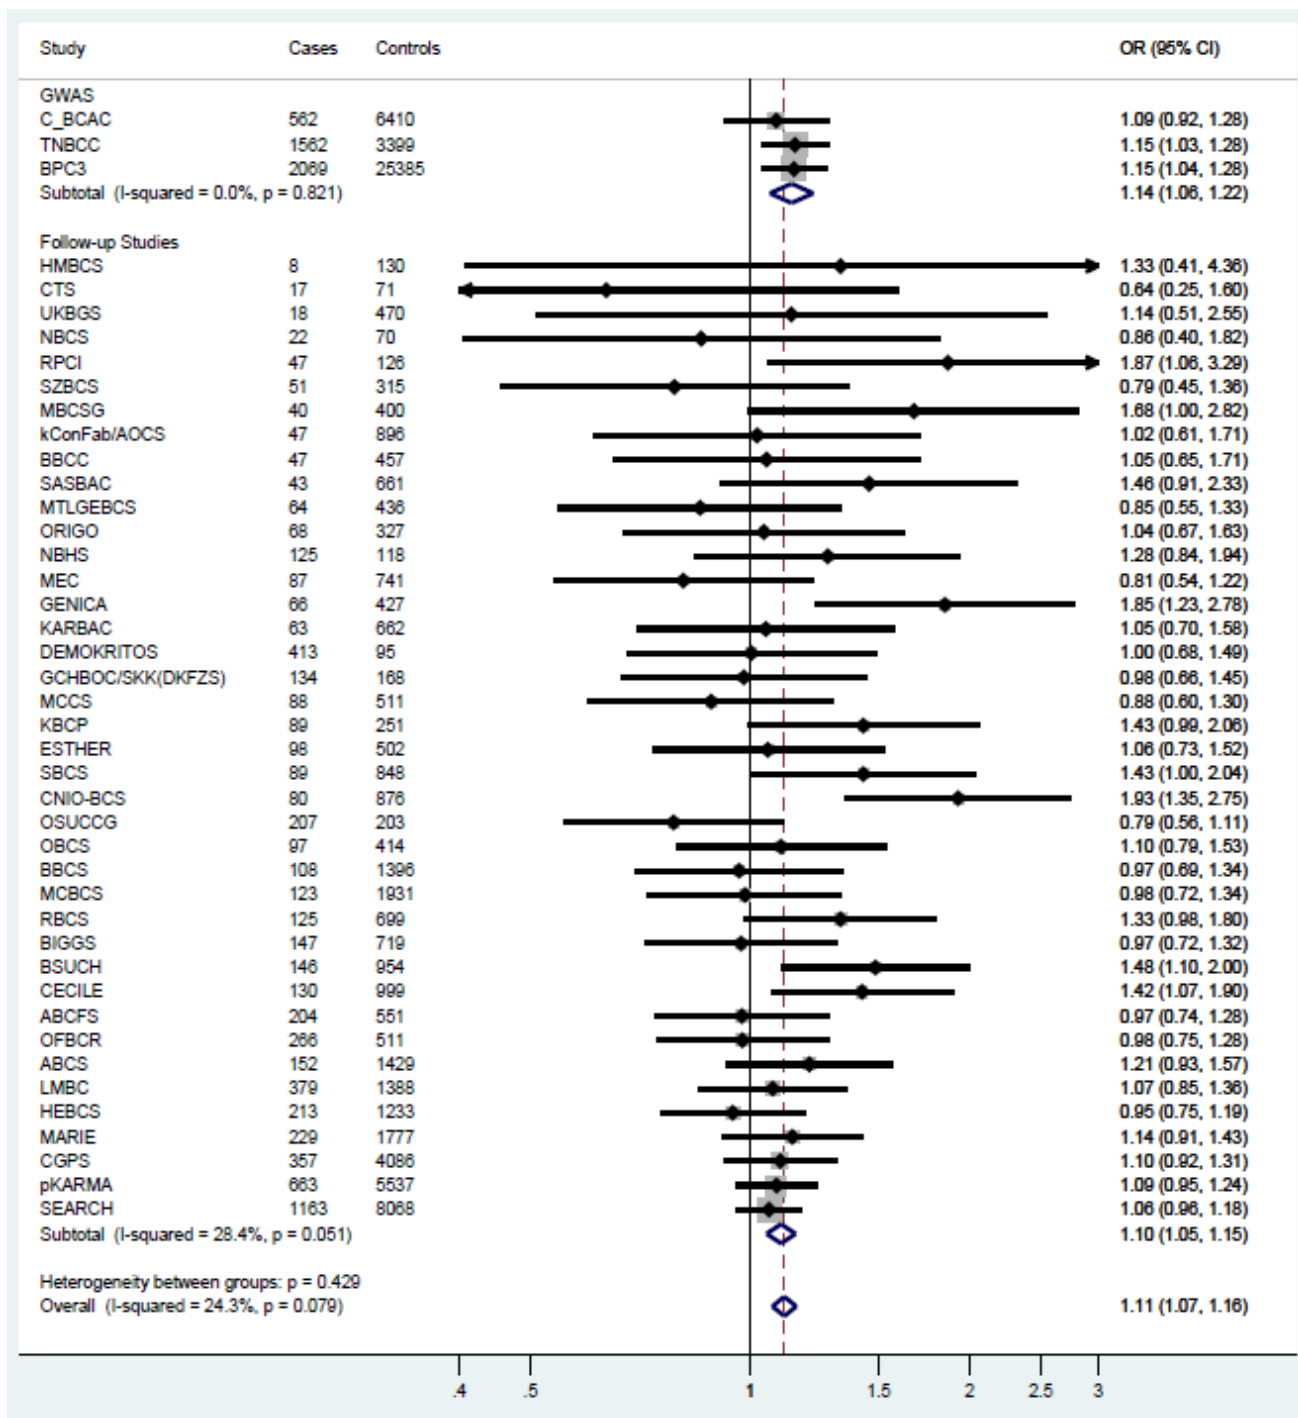

**Supplementary Figure 4:** Linkage Disequilibrium (LD) Structure at the 1q32.1/*MDM4*, 1q32.1/*LGR6*, 2p24 and 16q12.2/*FTO* loci. rs3751812 is used as a surrogate for the obesity-related SNP rs9939609<sup>14</sup>. rs17817449 is ~5Kb from rs3751812 and has been associated with ER-positive and ER-negative disease<sup>15</sup>. Pairwise LD plots generated using data from the HapMap CEU population and estimated by  $r^2$  (top panel) and  $D'$  (bottom panel). The positions of rs4245739, rs6678914 and rs6678914 are indicated. Gene positions are approximate. Genomic coordinates are from NCBI build 36.

A. 1q32 (*MDM4*) from 202,585kb to 202,885kb

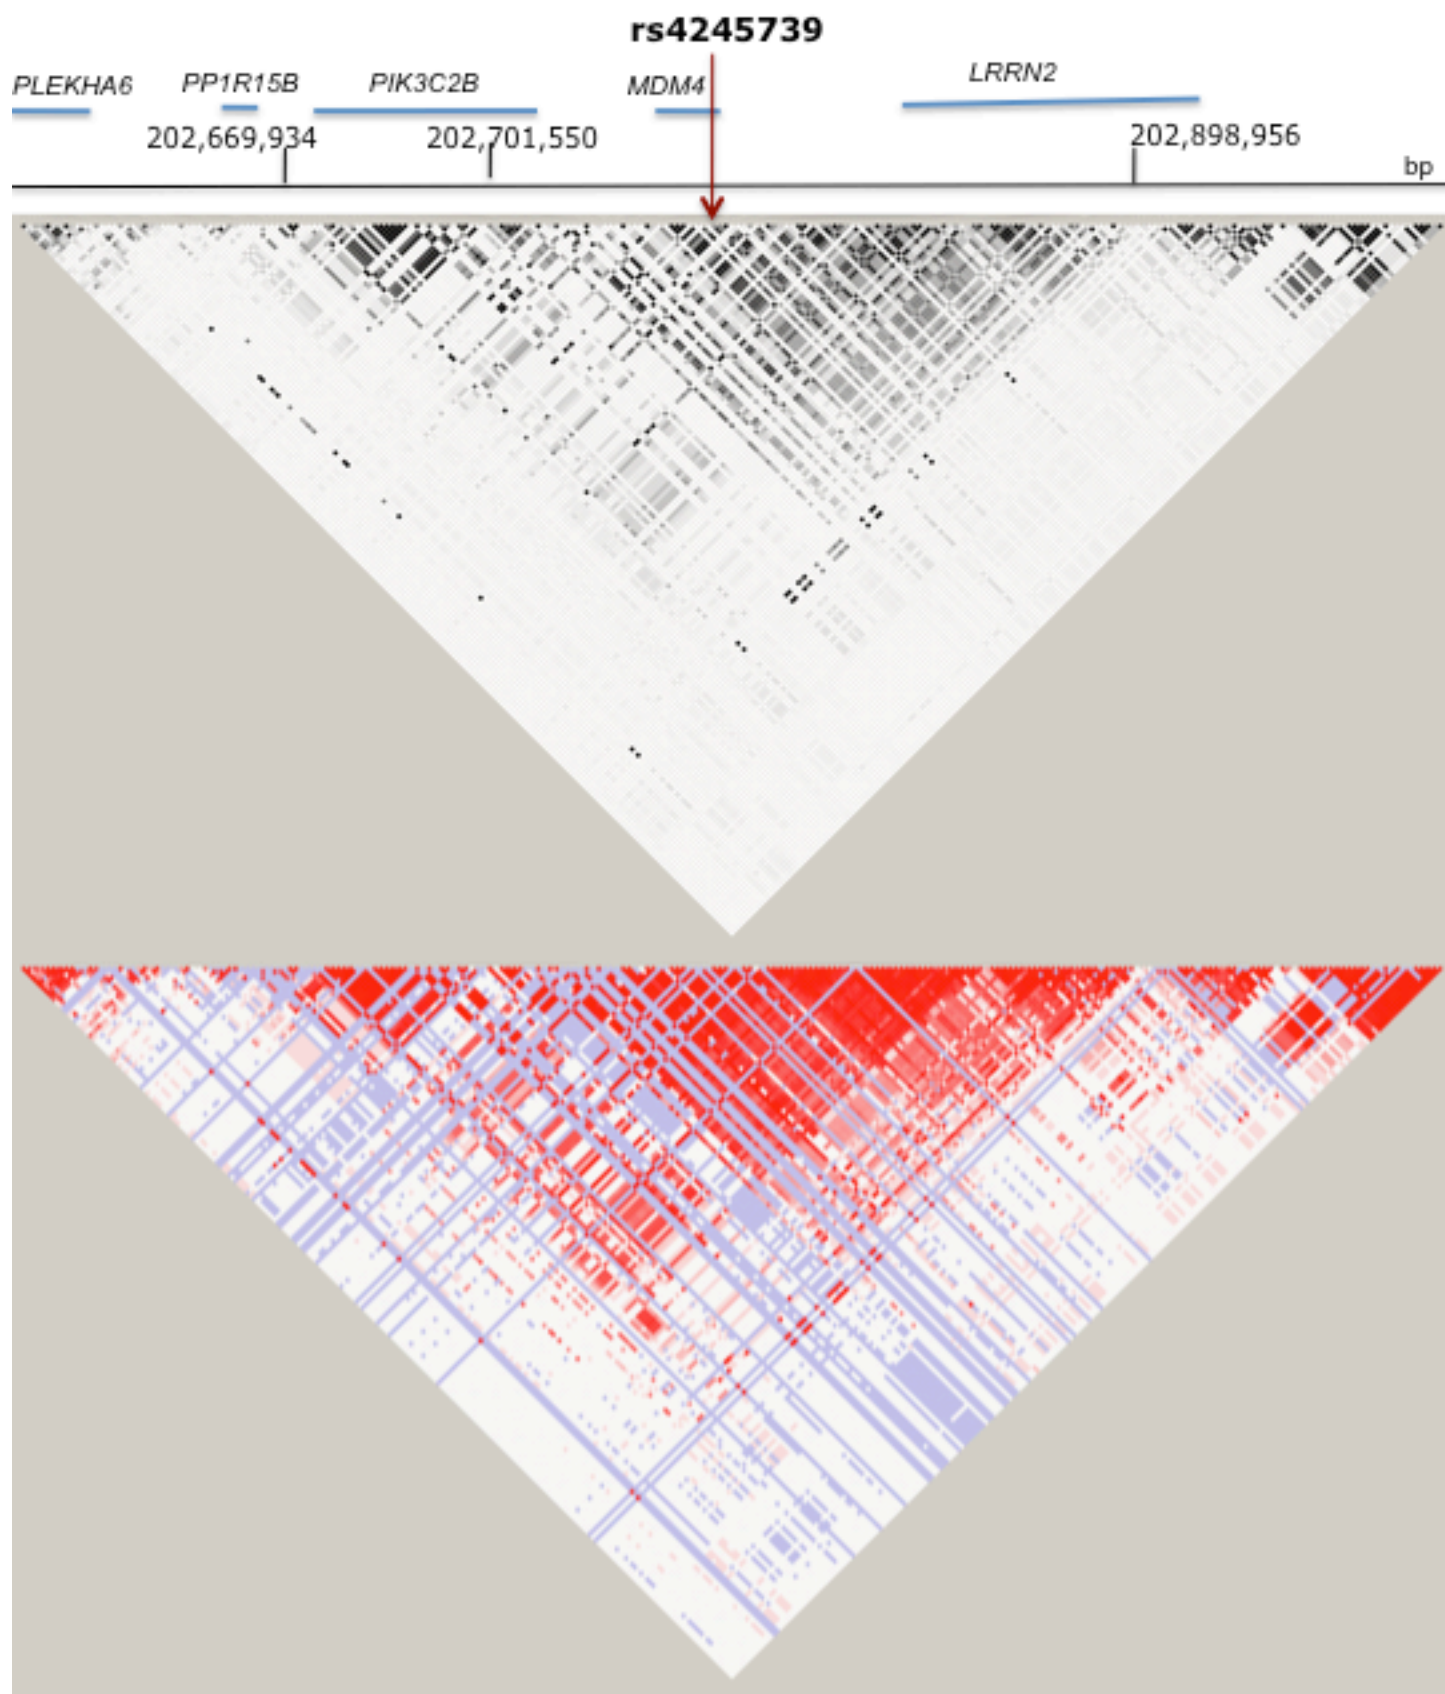



B. 1q32.1 (*LGR6*) from 200380kb to 200880kb

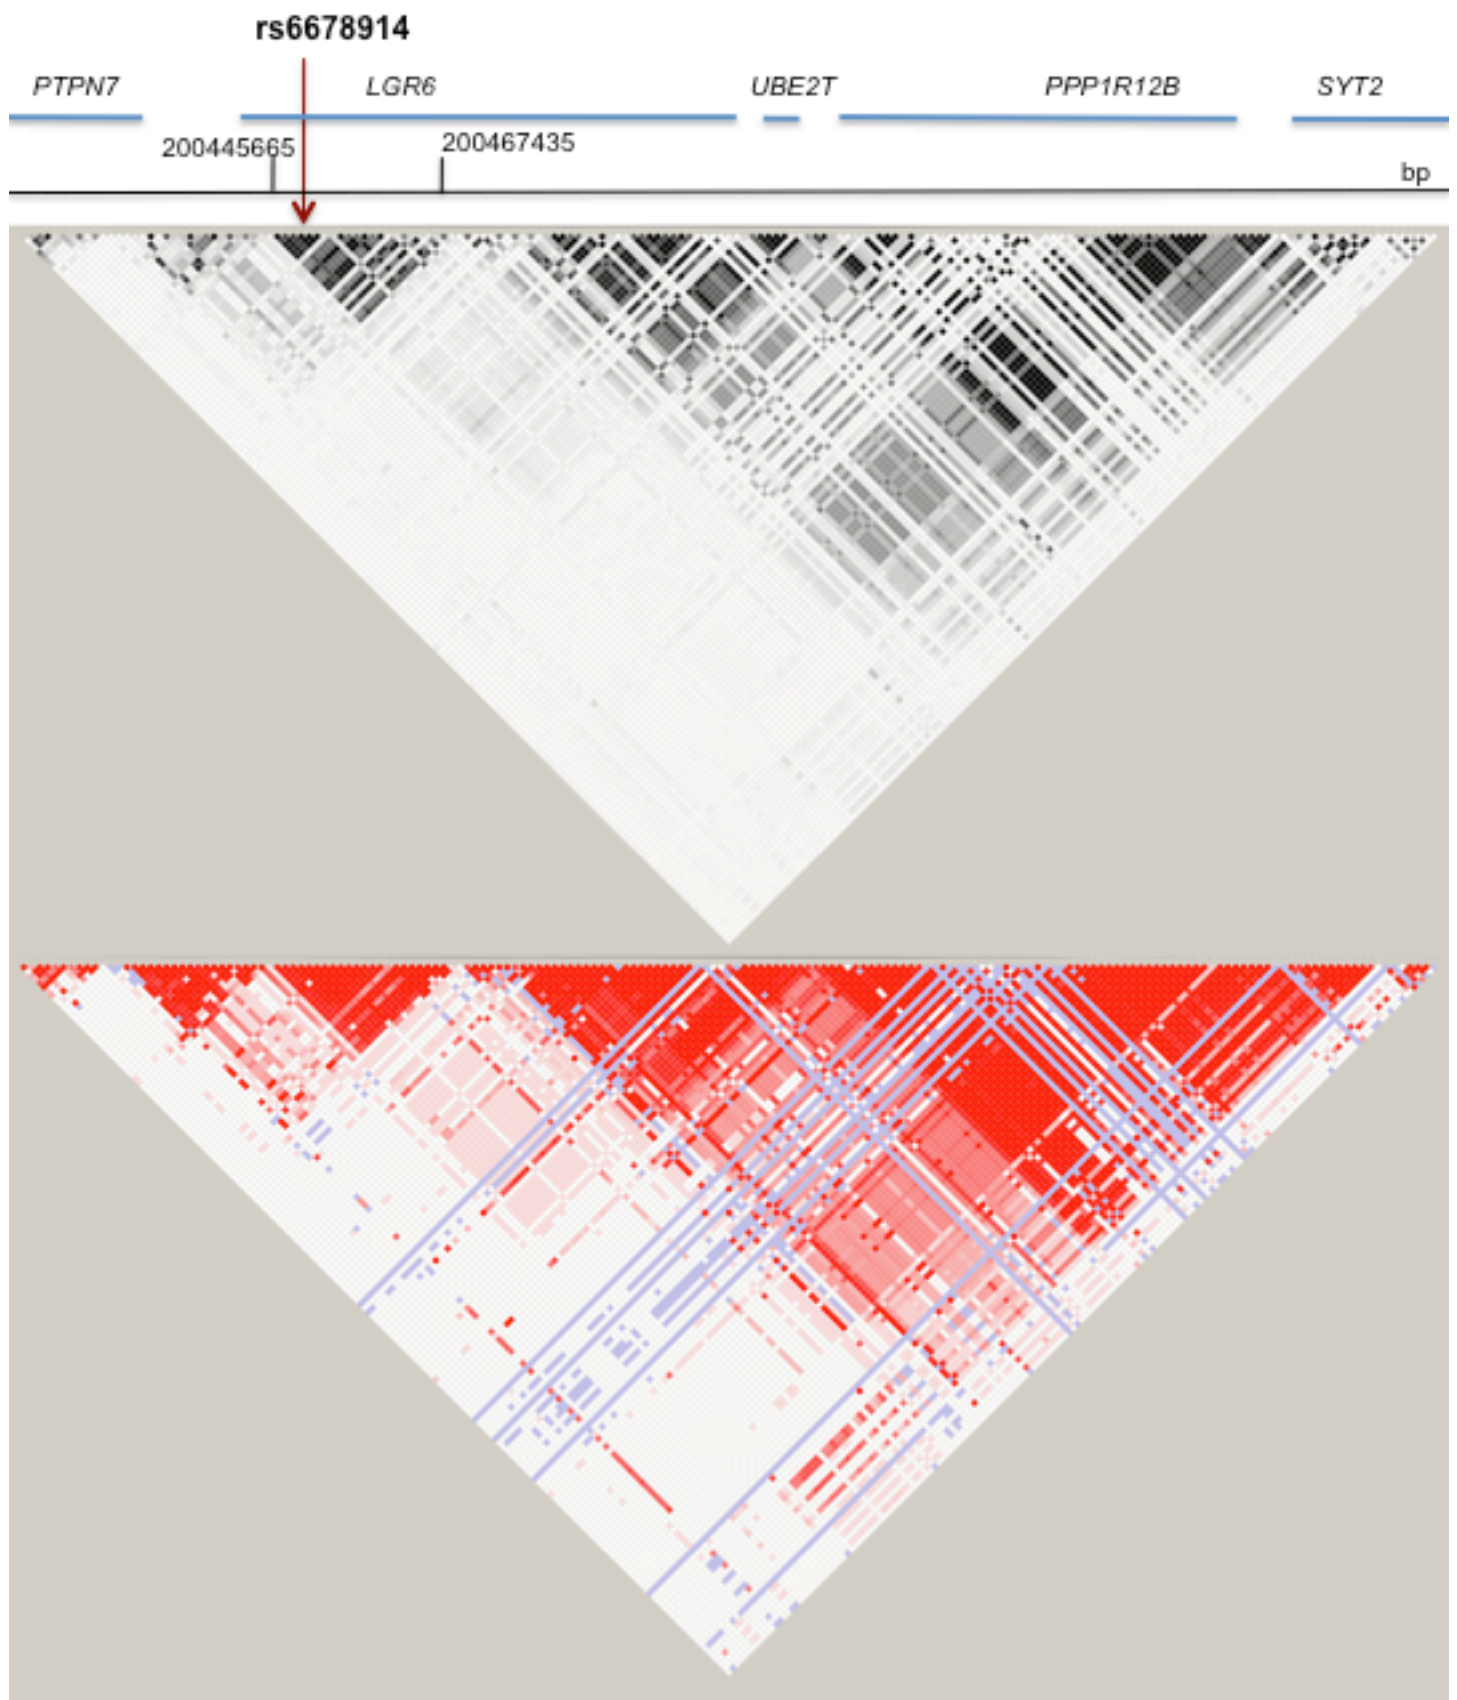

C.

2p24 from 18984kb to 19284kb

**rs12710696**

19,173,704

19,325,619

19,351,987

bp

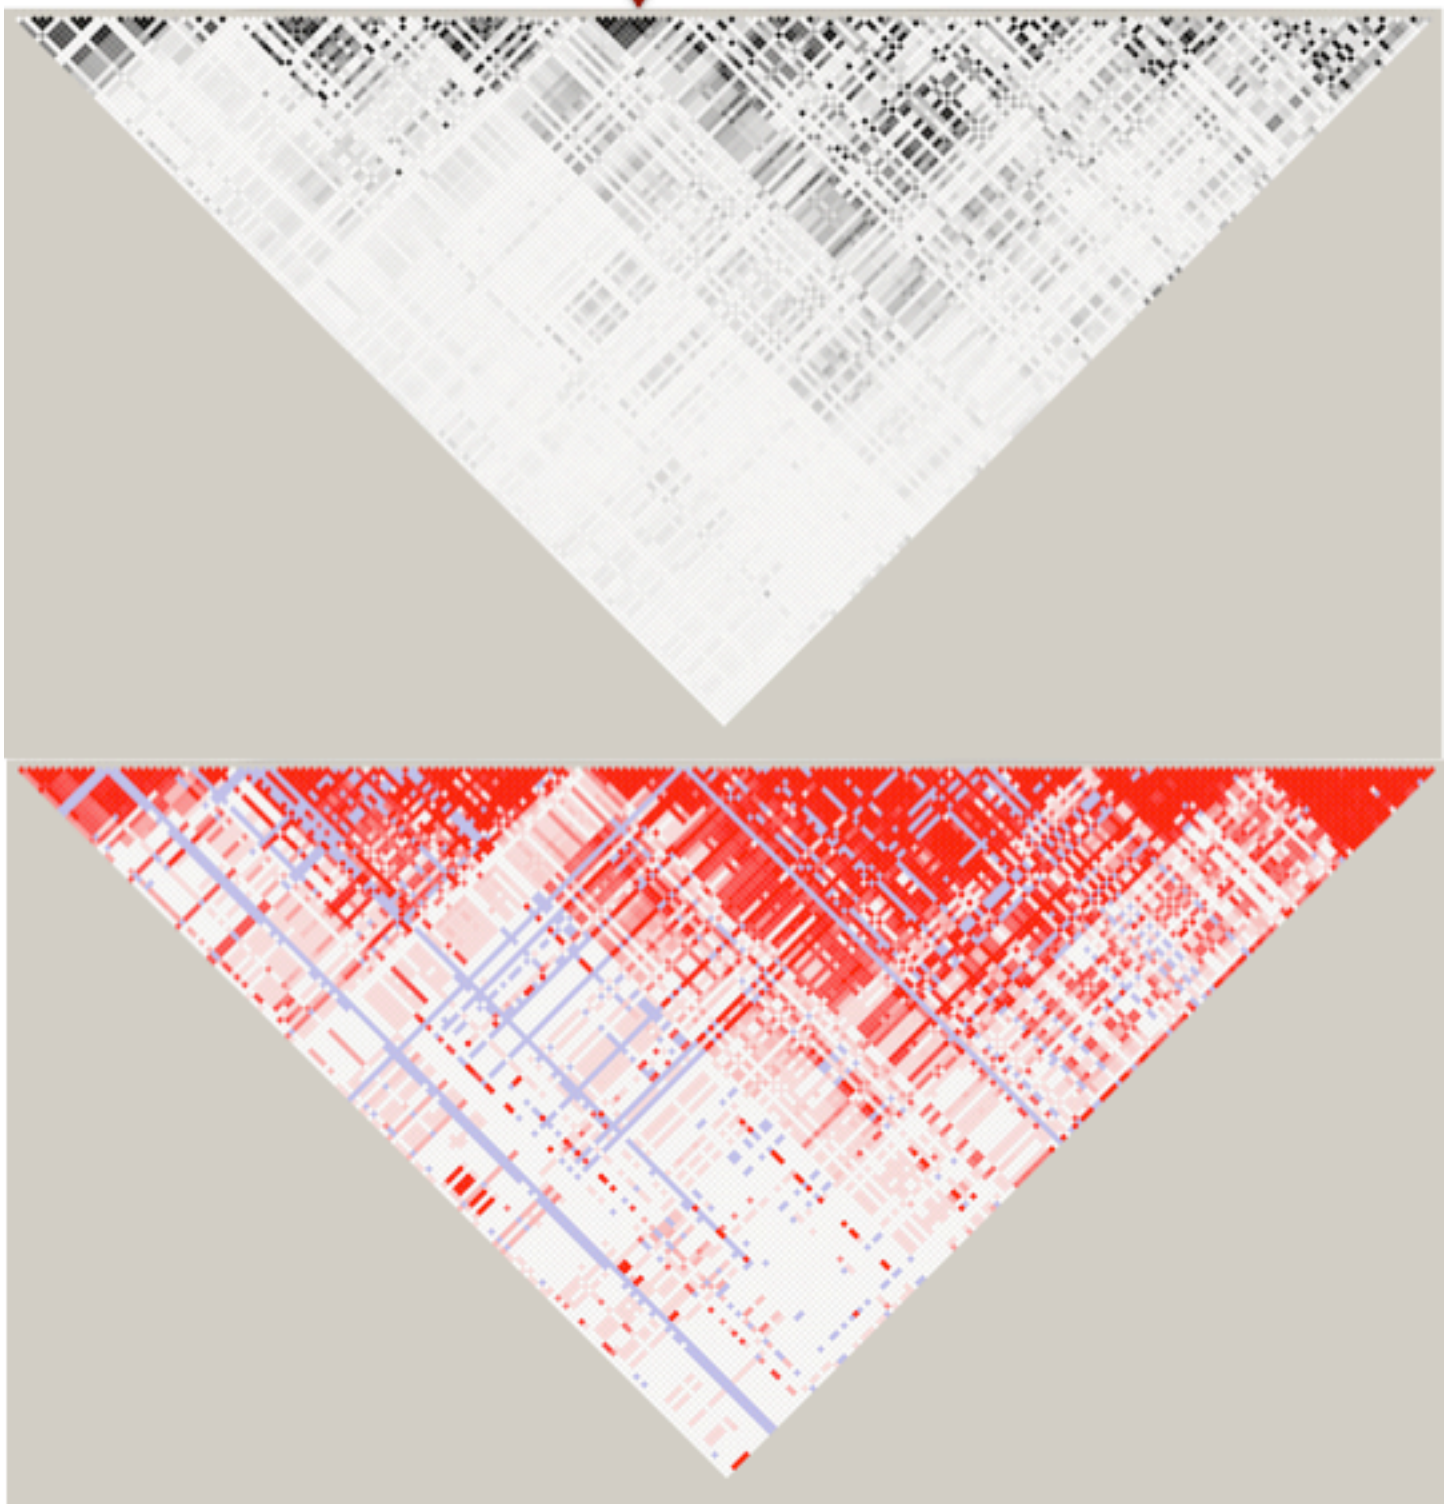

D.

16q12.2 from 52310kb to 52509kb

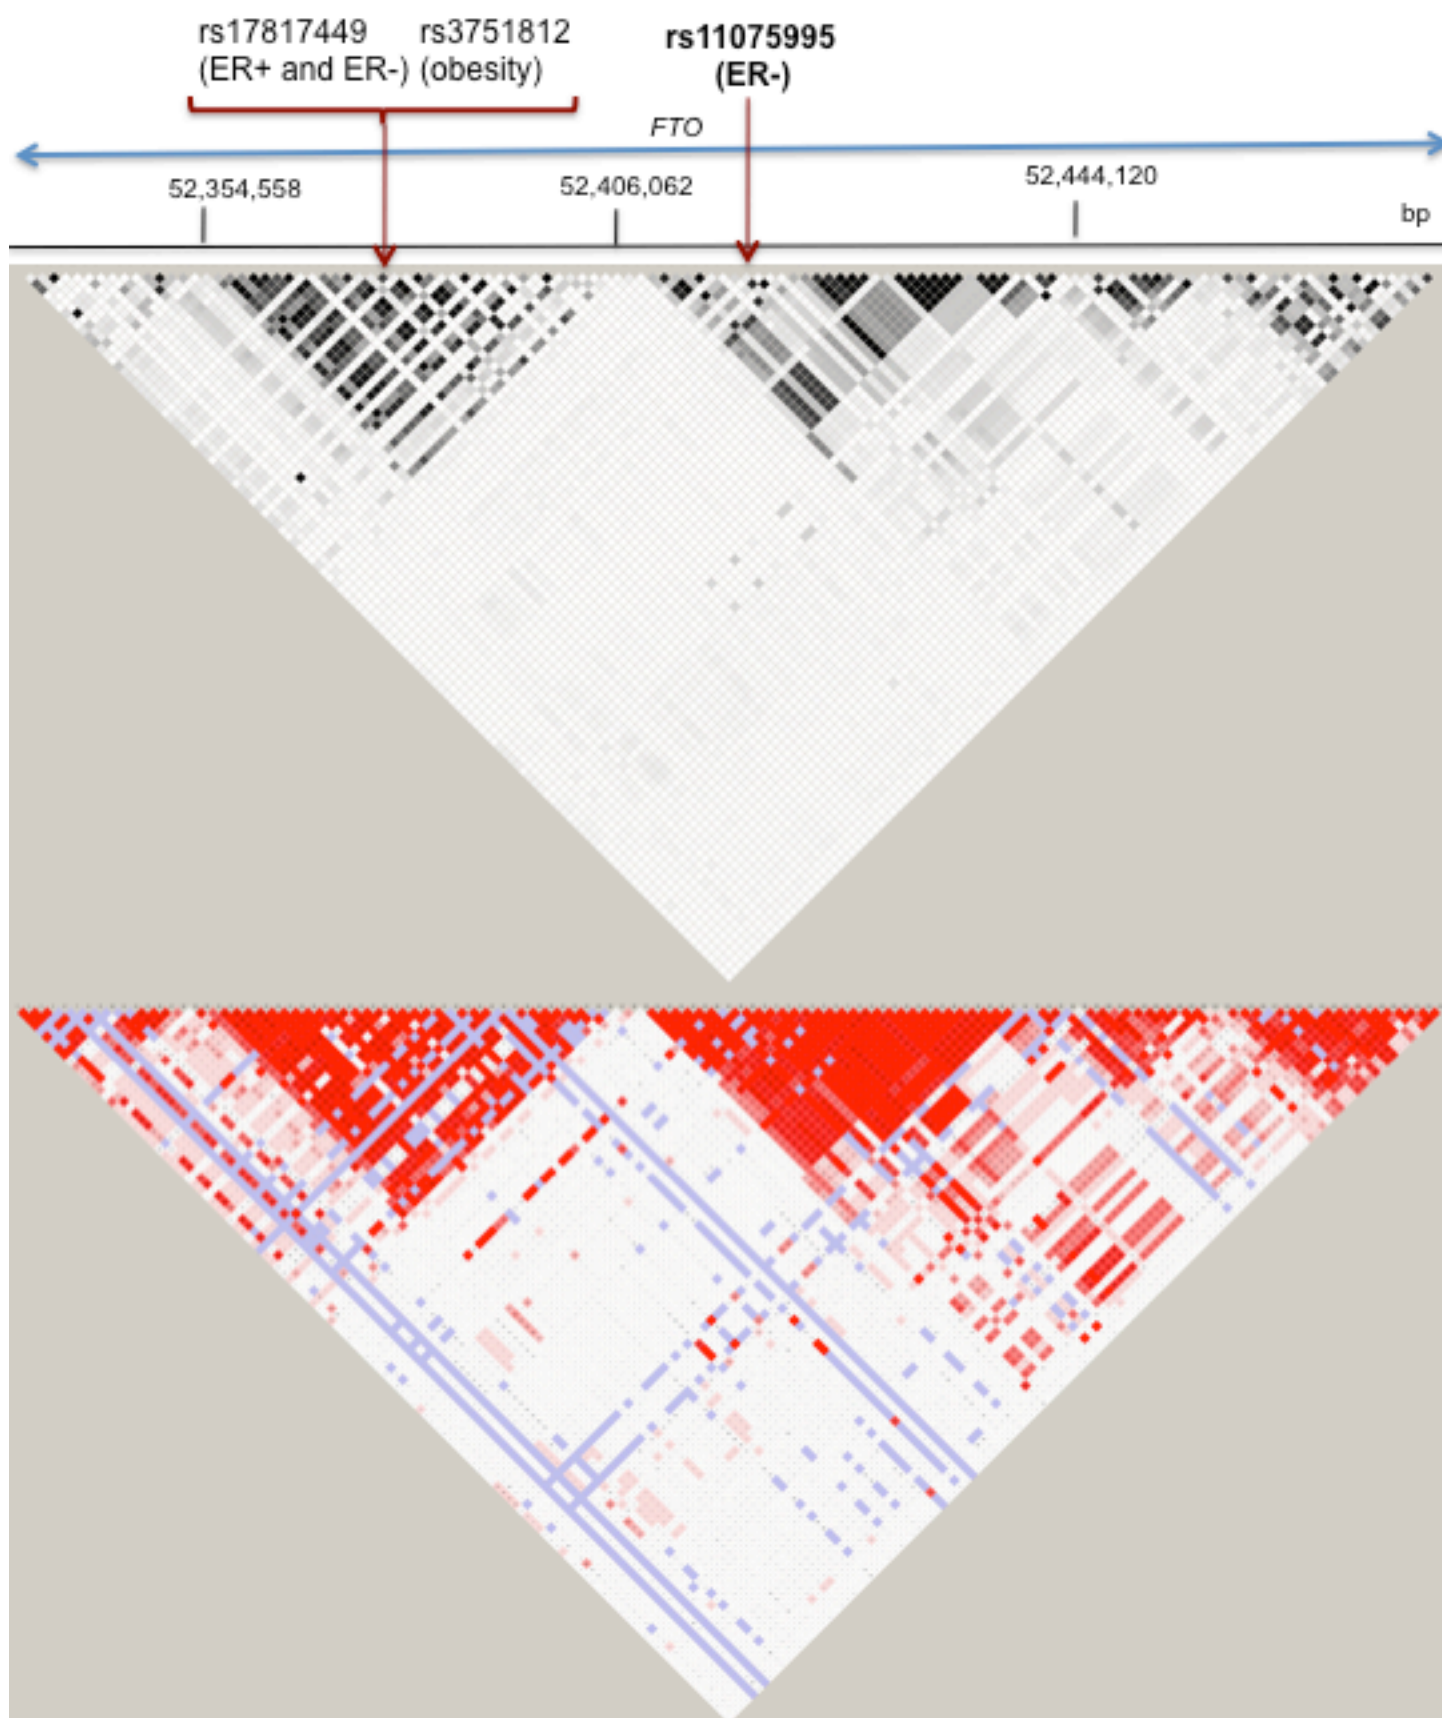

**Supplementary Figure 5:** Chromatin features for 1q32.1/*MDM4*, 1q32.1/*LGR6*, 2p24 and 16q12.2/*FTO* regions in normal human mammary epithelial cells (HMEC) and triple negative breast cancer cells (MDAMB231).

First track shows FunciSNP result. The name of correlated SNP (rsnumber –  $r^2$  value) is shown and colour coded to indicate the number of biofeatures. The bottom tracks are biofeature tracks and RefSeq genes/mRNA/Pseudogene tracks. rsnumber colour code for number of biofeatures (dark blue:0, green:5 brown:10). We collected 9,893 SNPs, which coincided with one or more biofeatures, in a 1Mb window of each of the four tagSNP from the 1000 genome projects in European ethnic group. Among them, 64 SNPs had  $R^2$  value  $\geq 0.5$  with the tagSNP. Among the 64 SNPs, 17 SNPs were coinciding with 5 or more biofeatures

# A. rs4245739 in 1a32.1/*MDM4*

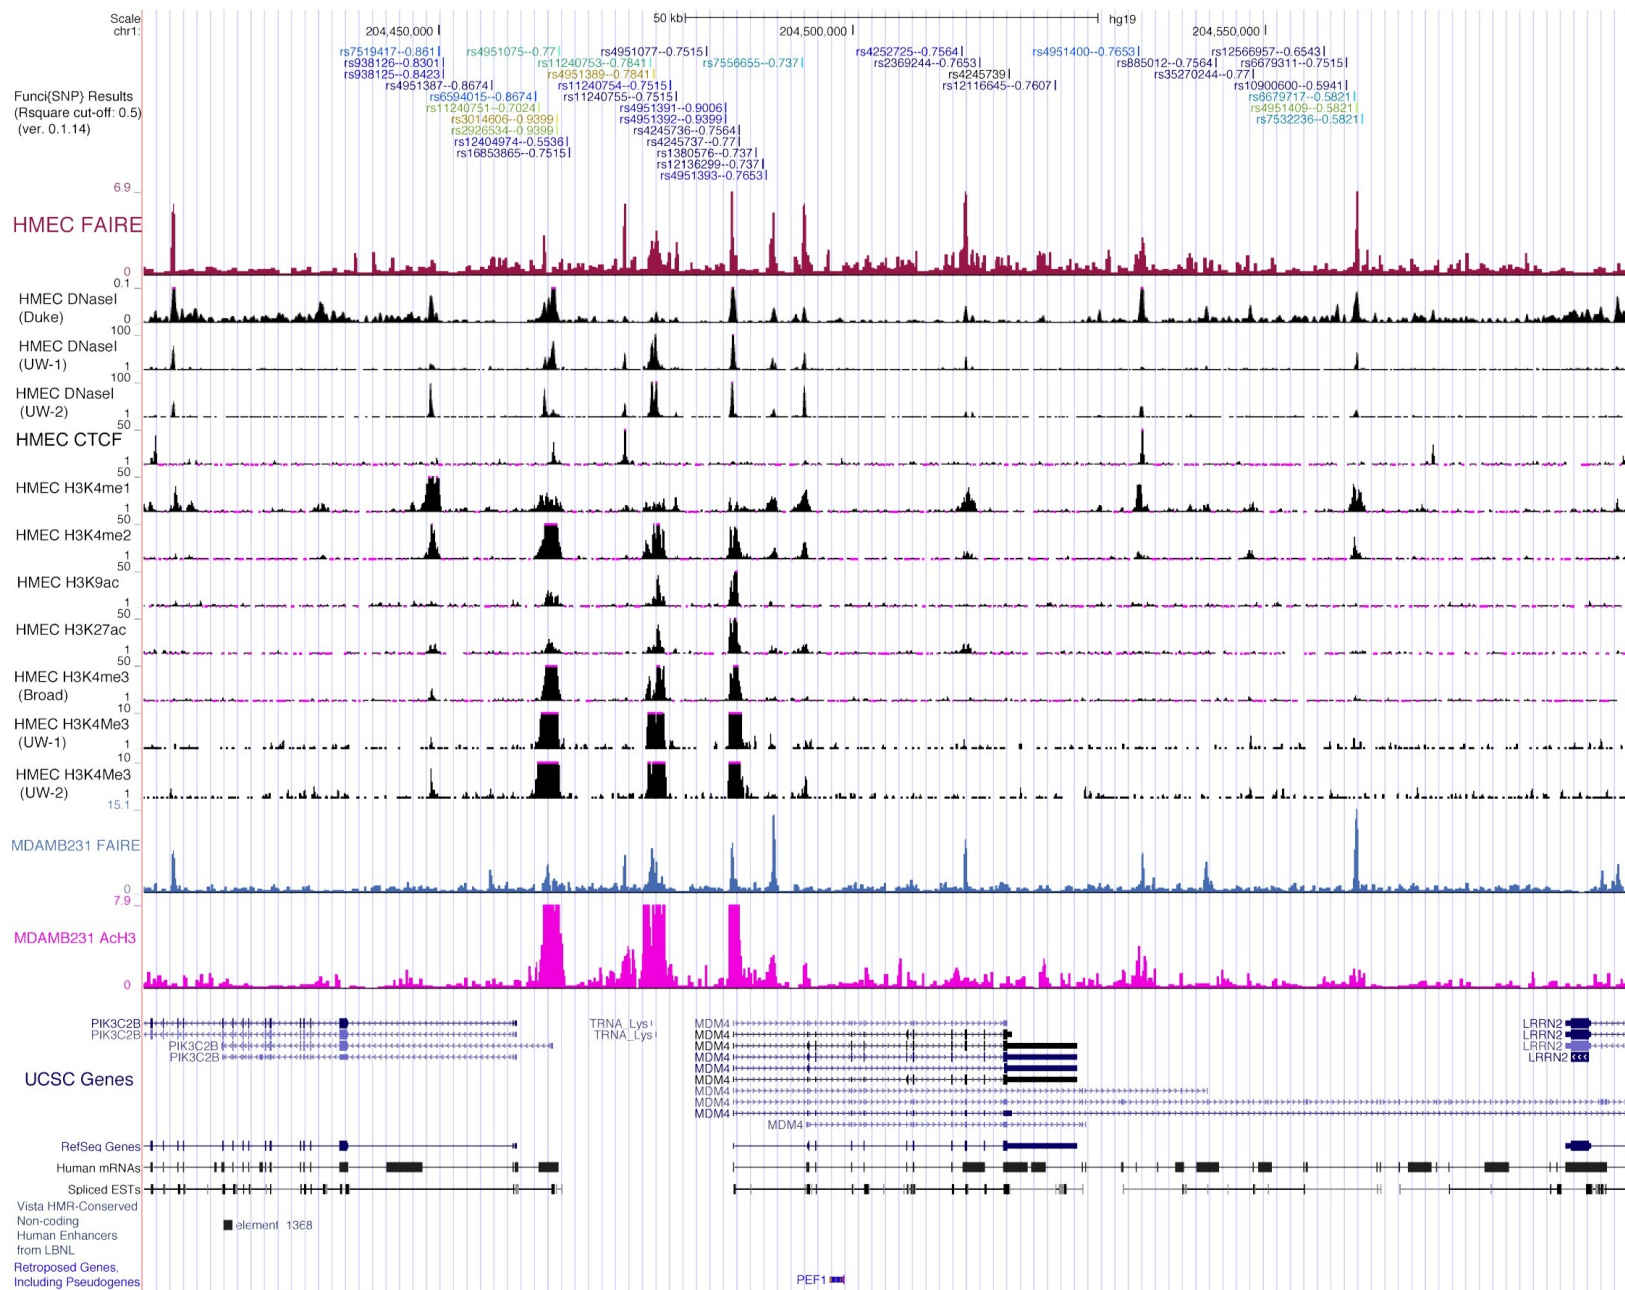

## B. rs6678914 1q32.1/LGR6

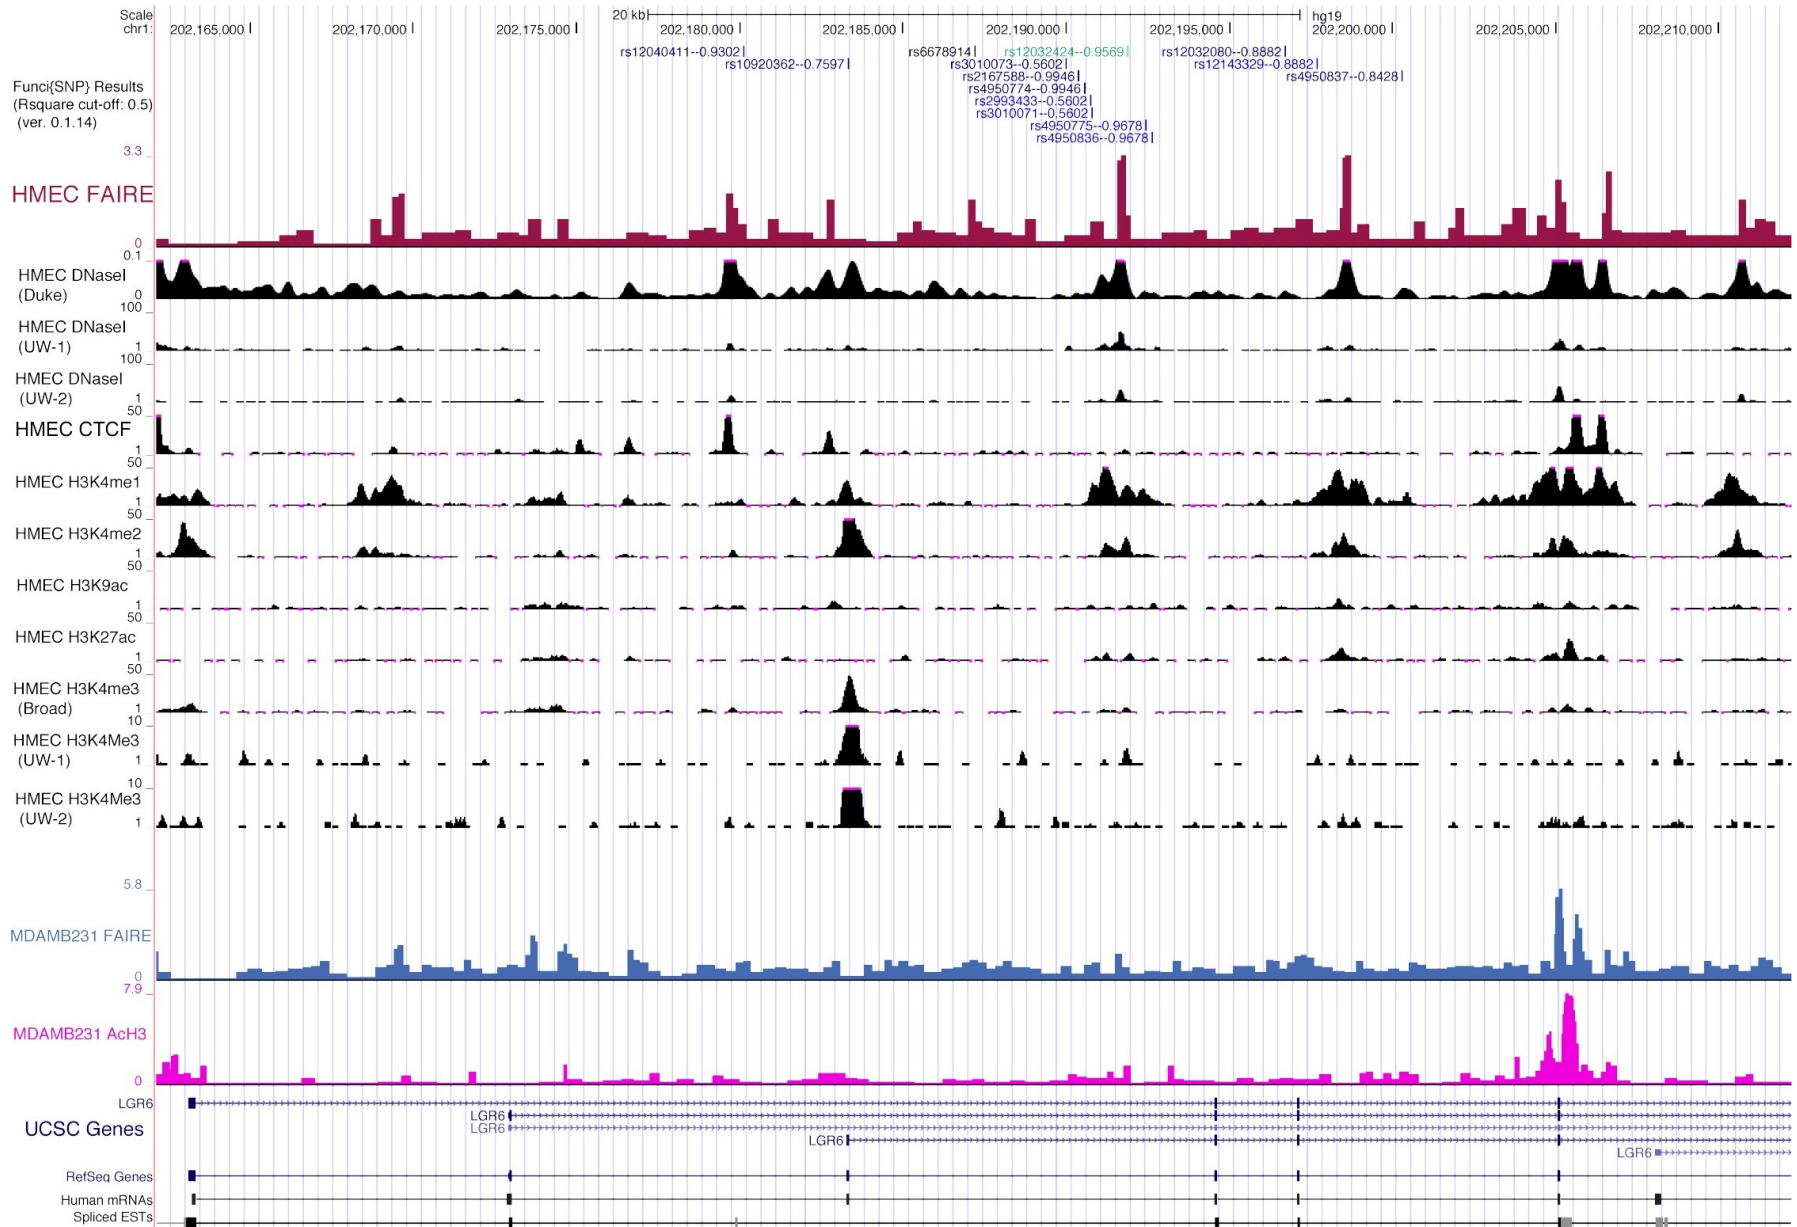

### C. rs12710696 2p24

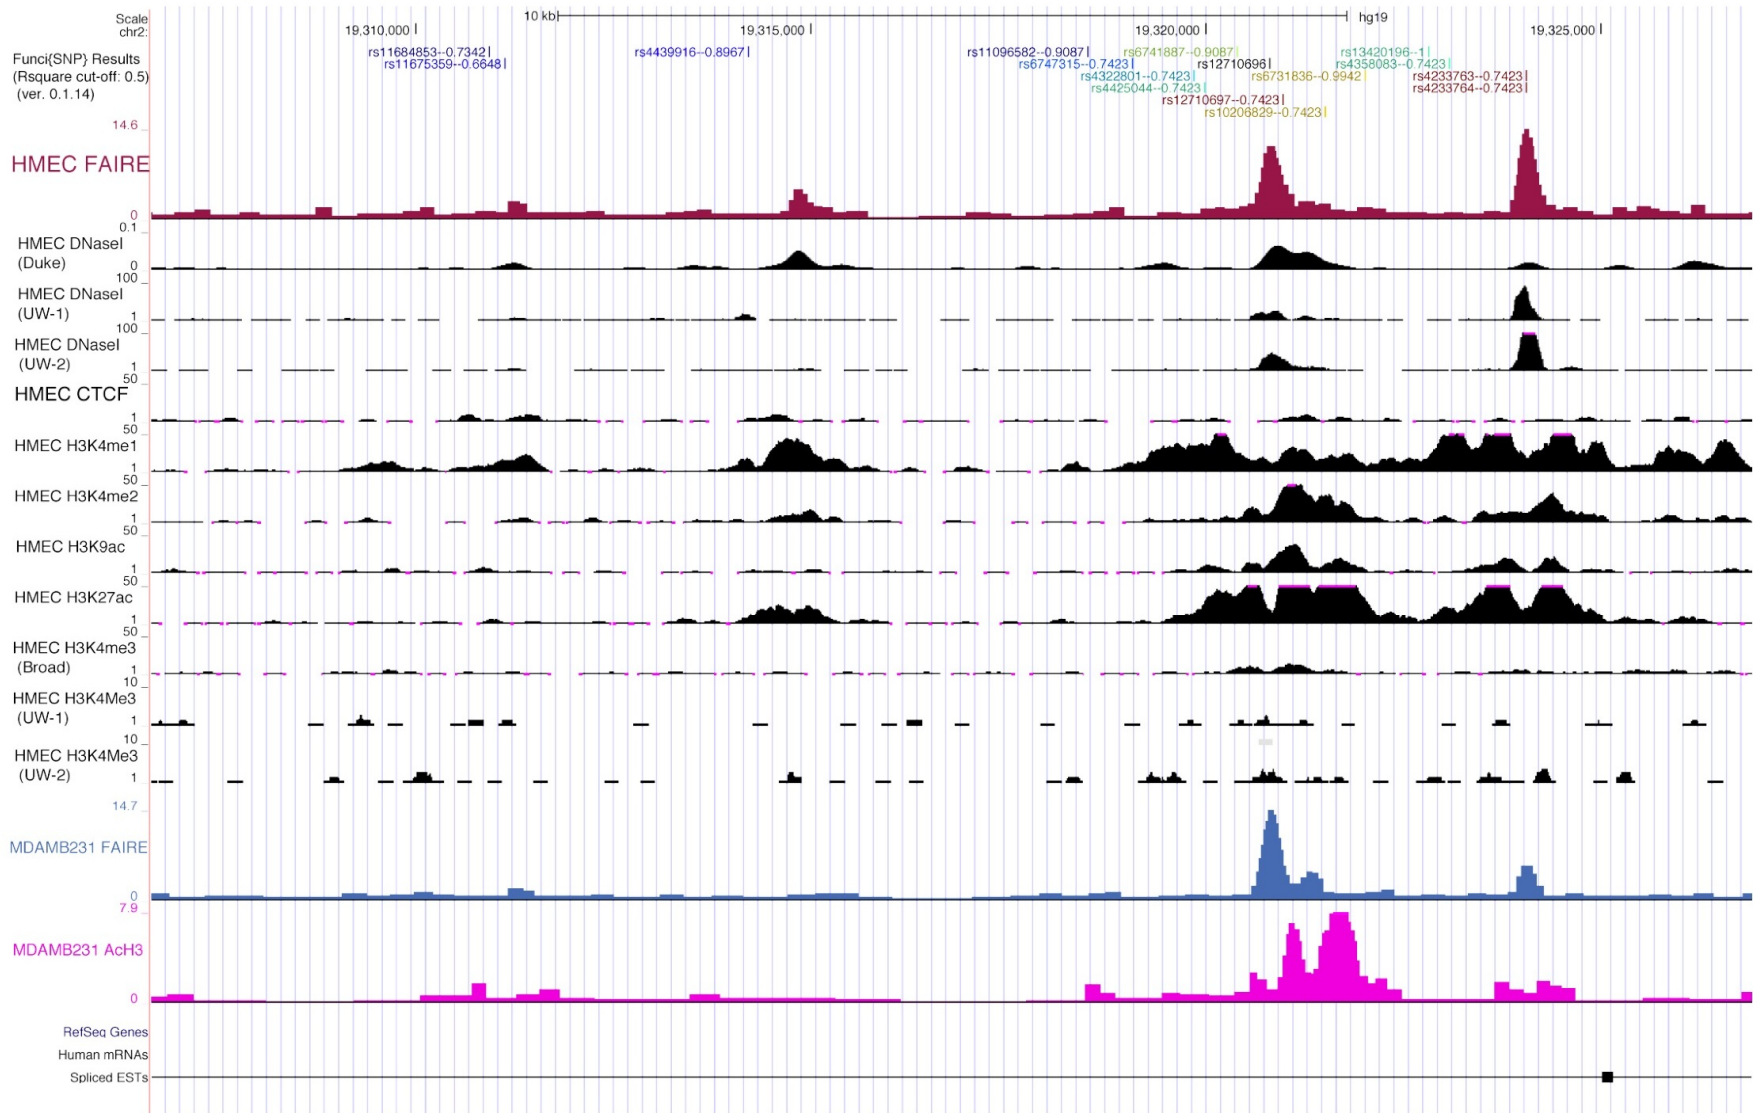

## D. rs11075995 6q12.2/*FTO*

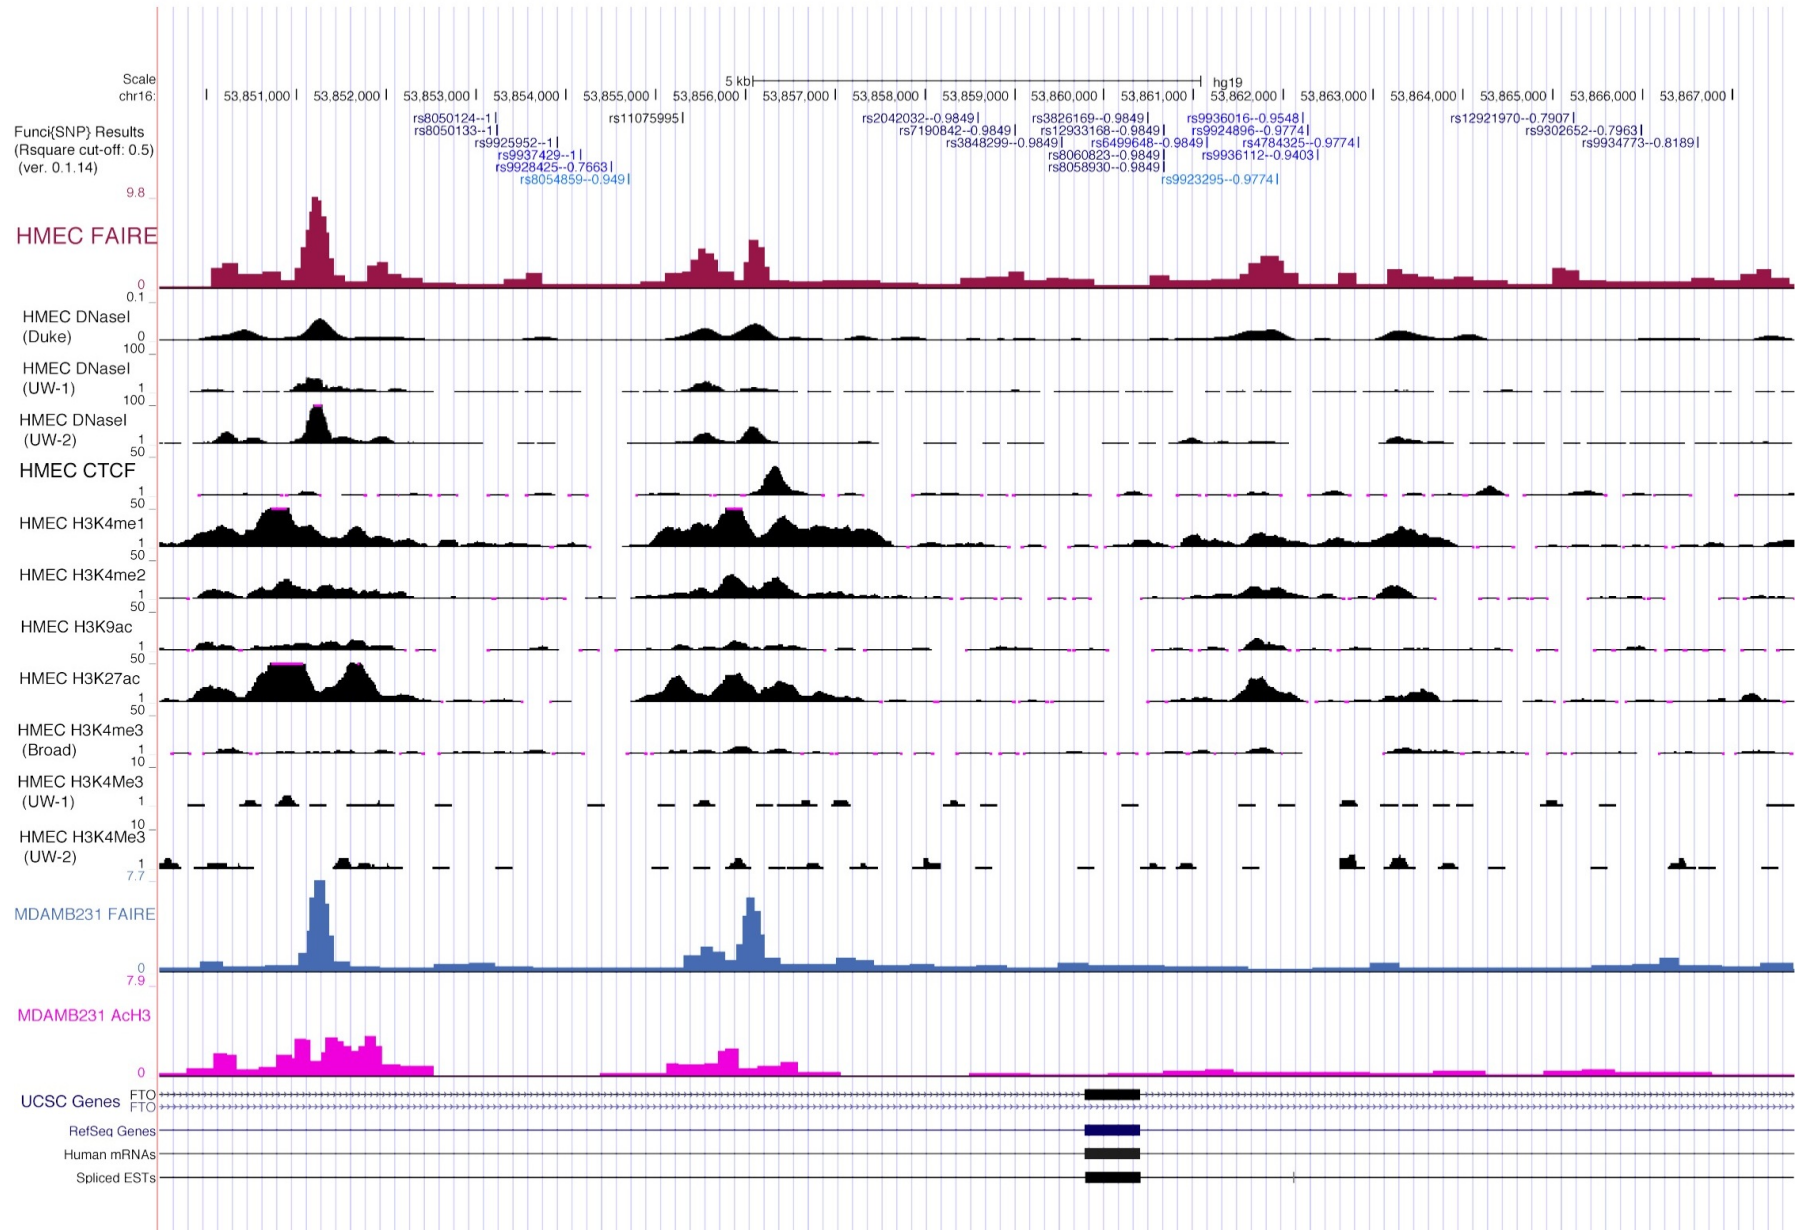



Supplementary Table 1: Number of breast cancer cases and controls in each of the study populations. Numbers for BPC3, TNBCC, C-BCAC and BCAC replication in European populations exclude of subjects that overlapped between studies.

| Consortium/Study                             | Study Abbreviation | Full Name                                                                                 | Country     | Controls      | ER + cases | ER - cases   | TN cases     |
|----------------------------------------------|--------------------|-------------------------------------------------------------------------------------------|-------------|---------------|------------|--------------|--------------|
| <b>BPC3</b>                                  | CPS-II             | Cancer Prevention Study II Nutrition Cohort                                               | USA         | 295           |            | 293          | 66           |
| Breast and Prostate Cancer Cohort Consortium | EPIC               | European Prospective Investigation into Cancer and Nutrition                              | Europe      | 467           |            | 478          | 93           |
|                                              | NHS                | The Nurses' Health Study                                                                  | USA         | 184           |            | 234          | 86           |
|                                              | NHSII              | The Nurses' Health Study II                                                               | USA         | 374           |            | 76           | 34           |
|                                              | PLCO               | Prostate, Lung, Colorectal and Ovarian Cancer Screening Trial                             | USA         | 340           |            | 255          | 98           |
|                                              | PBCS               | Polish Breast Cancer Study                                                                | Poland      | 511           |            | 543          | 229          |
|                                              | WGHS               | Women's Genome Health Study                                                               | USA         | 23,214        |            | 190          | NA           |
|                                              |                    | <b>TOTAL</b>                                                                              |             | <b>25,385</b> |            | <b>2,069</b> | <b>606</b>   |
| <b>TNBCC</b>                                 | ABCTB              | Australian Breast Cancer Tissue Bank                                                      | Australia   |               |            |              | 144          |
| Triple Negative                              | BBCC               | Bavarian Breast Cancer Cases and Controls                                                 | Germany     |               |            |              | 218          |
| Breast Cancer Consortium                     | CGEMS              | Cancer Genetic Markers of Susceptibility                                                  | USA         | 947           |            |              |              |
|                                              | DFCI               | Harvard Breast Cancer SPORE Blood Repository                                              | USA         |               |            |              | 246          |
|                                              | FCCC               | Fox Chase Cancer Center                                                                   | USA         |               |            |              | 120          |
|                                              | GENICA             | Gene Environment Interaction and Breast Cancer in Germany                                 | Germany     |               |            |              | 59           |
|                                              | HEBCS              | Helsinki Breast Cancer Study                                                              | Finland     | 219           |            |              | 83           |
|                                              | KORA               | Cooperative Health Research in the Region of Augsburg                                     | Germany     | 215           |            |              |              |
|                                              | MARIE              | Mammary Carcinoma Risk Factor Investigation                                               | Germany     |               |            |              | 198          |
|                                              | MCBCS              | Mayo Clinic Breast Cancer Study                                                           | USA         |               |            |              | 147          |
|                                              | MCCS               | Melbourne Collaborative Cohort Study                                                      | Australia   |               |            |              | 39           |
|                                              | POSH               | Prospective Study of Outcomes in Sporadic Versus Hereditary Breast Cancer                 | UK          |               |            |              | 266          |
|                                              | QIMR               | Australian Twin Cohort study from the Queensland Institute of Medical Research            | Australia   | 650           |            |              |              |
|                                              | SBCS               | Sheffield Breast Cancer Study                                                             | UK          |               |            |              | 42           |
|                                              | WTCCC              | Wellcome Trust Case Control Consortium                                                    | UK          | 1,368         |            |              |              |
|                                              |                    | <b>TOTAL</b>                                                                              |             | <b>3,399</b>  |            |              | <b>1,562</b> |
| <b>C-BCAC</b>                                | ABCFS              | Northern California Australian Breast Cancer Family Study                                 | Australia   | 285           |            | 72           |              |
| Breast Cancer Association Consortium         | MARIE              | Mammary Carcinoma Risk Factor Investigation                                               | Germany     | 470           |            | 76           |              |
| Combined GWAS                                | HEBCS              | Helsinki Breast Cancer Study                                                              | Finland     | 1,012         |            | 145          |              |
|                                              | SASBAC             | Singapore and Sweden Breast Cancer Study                                                  | Sweden      | 756           |            | 109          |              |
|                                              | UK2                | UK Familial Breast Cancer Study                                                           | UK          | 3,887         |            | 160          |              |
|                                              |                    | <b>TOTAL</b>                                                                              |             | <b>6,410</b>  |            | <b>562</b>   |              |
| <b>AABC</b>                                  | CARE               | The Los Angeles component of The Women's Contraceptive and Reproductive Experiences Study | USA         | 215           |            | 130          |              |
| African-American Breast Cancer Consortium    | CBCS               | The Carolina Breast Cancer Study                                                          | USA         | 589           |            | 317          |              |
|                                              | MEC-AA             | Multiethnic Cohort                                                                        | USA         | 990           |            | 176          |              |
|                                              | NBHS               | The Nashville Breast Health Study                                                         | USA         | 182           |            | 65           |              |
|                                              | NC-BCFR            | The Northern California Breast Cancer Family Registry                                     | USA         | 50            |            | 121          |              |
|                                              | PLCO               | Prostate, Lung, Colorectal and Ovarian Cancer Screening Trial                             | USA         | 116           |            | 6            |              |
|                                              | SFBCS              | The San Francisco Bay Area Breast Cancer Study                                            | USA         | 220           |            | 50           |              |
|                                              | WCHS               | The Women's Circle of Health Study                                                        | USA         | 239           |            | 80           |              |
|                                              | WFBC               | Wake Forest University Breast Cancer Study                                                | USA         | 144           |            | 43           |              |
|                                              |                    | <b>TOTAL</b>                                                                              |             | <b>2,745</b>  |            | <b>988</b>   |              |
| <b>BCAC Replication</b>                      | <b>European</b>    |                                                                                           |             |               |            |              |              |
|                                              | ABCFS              | Australian Breast Cancer Family Study                                                     | Australia   | 551           | 382        | 204          |              |
|                                              | ABCS               | Amsterdam Breast Cancer Study                                                             | Netherlands | 1,429         | 411        | 152          | 81           |
|                                              | BBCC               | Bavarian Breast Cancer Study                                                              | Germany     | 457           | 454        | 47           | 24           |
|                                              | BBCS               | British Breast Cancer Study                                                               | UK          | 1,397         | 493        | 108          | 29           |
|                                              | BIGGS              | Breast Cancer In Galway Genetic Study                                                     | Ireland     | 719           | 476        | 147          | 35           |
|                                              | BSUCH              | Breast Cancer Study of the University Clinic Heidelberg                                   | Germany     | 954           | 479        | 147          | 75           |
|                                              | CECILE             | CECILE Breast Cancer Study                                                                | France      | 999           | 743        | 130          | 67           |
|                                              | CGPS               | Copenhagen General Population Study                                                       | Denmark     | 4,086         | 1,919      | 357          | 80           |
|                                              | CNIO-BCS           | Spanish National Cancer Centre Breast Cancer Study                                        | Spain       | 876           | 216        | 80           | 32           |

|                          |                                                                                                                                     |              |               |               |               |              |
|--------------------------|-------------------------------------------------------------------------------------------------------------------------------------|--------------|---------------|---------------|---------------|--------------|
| CTS*                     | California Teachers Study                                                                                                           | USA          | 71            |               | 17            | 17           |
| DEMOKRITOS*              | Demokritos                                                                                                                          | Greece       | 95            |               | 413           | 413          |
| ESTHER                   | ESTHER Breast Cancer Study                                                                                                          | Germany      | 502           | 302           | 98            | 23           |
| GC-HBOC <sup>a</sup>     | German Consortium for Hereditary Breast & Ovarian Cancer, and Städtisches Klinikum Karlsruhe Deutsches Krebsforschungszentrum Study | Germany      | 139           |               |               |              |
| GENICA                   | Gene Environment Interaction and Breast Cancer in Germany                                                                           | Germany      | 427           | 327           | 66            | 5            |
| HEBCS                    | Helsinki Breast Cancer Study                                                                                                        | Finland      | 1,233         | 1,231         | 213           | 82           |
| HMBCS                    | Hannover-Minsk Breast Cancer Study                                                                                                  | Belarus      | 130           | 35            | 8             |              |
| KARBAC                   | Karolinska Breast Cancer Study                                                                                                      | Sweden       | 662           | 338           | 63            |              |
| KBCP                     | Kuopio Breast Cancer Project                                                                                                        | Finland      | 251           | 288           | 89            | 60           |
| LMBC                     | Leuven Multidisciplinary Breast Centre                                                                                              | Belgium      | 1,388         | 2,068         | 379           | 215          |
| MARIE                    | Mammary Carcinoma Risk Factor Investigation                                                                                         | Germany      | 1,778         | 1,257         | 229           | 51           |
| MBCSG                    | Milan Breast Cancer Study Group                                                                                                     | Italy        | 400           | 128           | 40            | 9            |
| MCBCS                    | Mayo Clinic Breast Cancer Study                                                                                                     | USA          | 1,931         | 1,271         | 123           | 26           |
| MCCS                     | Melbourne Collaborative Cohort Study                                                                                                | Australia    | 511           | 350           | 88            | 34           |
| MEC                      | Multi-ethnic Cohort                                                                                                                 | USA          | 741           | 412           | 87            | 8            |
| MTLGEBCS                 | Montreal Gene-Environment Breast Cancer Study                                                                                       | Canada       | 436           | 421           | 64            | 45           |
| NBCS*                    | Norwegian Breast Cancer Study                                                                                                       | Norway       | 70            |               | 22            | 21           |
| NBHS*                    | The Nashville Breast Health Study                                                                                                   | USA          | 118           |               | 125           | 125          |
| OBCS                     | Oulu Breast Cancer Study                                                                                                            | Finland      | 414           | 403           | 97            | 62           |
| OFBCR                    | Ontario Familial Breast Cancer Registry                                                                                             | Canada       | 511           | 630           | 266           |              |
| ORIGO                    | Leiden University Medical Centre Breast Cancer Study                                                                                | Netherlands  | 327           | 211           | 68            | 5            |
| OSUCCG*                  | Ohio State University                                                                                                               | USA          | 203           |               | 207           | 207          |
| RBCS                     | Rotterdam Breast Cancer Study                                                                                                       | Netherlands  | 699           | 366           | 125           | 11           |
| RPCI*                    | Roswell Park Cancer Institute                                                                                                       | USA          | 126           |               | 47            | 47           |
| SASBAC                   | Singapore and Sweden Breast Cancer Study                                                                                            | Sweden       | 661           | 198           | 43            |              |
| SBCS                     | Sheffield Breast Cancer Study                                                                                                       | UK           | 848           | 356           | 89            | 17           |
| SEARCH                   | Study of Epidemiology and Risk factors in Cancer Heredity                                                                           | UK           | 8,068         | 5,113         | 1,163         | 400          |
| SKK(DKFZS) <sup>a</sup>  | Städtisches Klinikum Karlsruhe and Deutsches Krebsforschungszentrum Breast Cancer Study                                             | Germany      | 29            |               | 134           | 134          |
| SZBCS                    | IHCC-Szczecin Breast Cancer Study                                                                                                   | Poland       | 315           | 149           | 51            | 6            |
| UKBGS                    | UK Breakthrough Generations Study                                                                                                   | UK           | 470           | 88            | 18            | 3            |
| kConFab/AOCS             | kConFab/AOCS                                                                                                                        | Australia    | 896           | 126           | 47            | 18           |
| pKARMA                   | Karolinska Mammography Project for Risk Prediction of Breast Cancer - prevalent cases                                               | Sweden       | 5,537         | 3,586         | 663           |              |
|                          |                                                                                                                                     | <b>TOTAL</b> | <b>41,455</b> | <b>25,227</b> | <b>6,514</b>  | <b>2,467</b> |
| <b>Asian</b>             |                                                                                                                                     |              |               |               |               |              |
| ACP                      | Asia Cancer Program                                                                                                                 | Thailand     | 636           | 91            | 52            |              |
| HERPACC                  | Hospital-based Epidemiologic Research Program at Aichi Cancer Center                                                                | Japan        | 1,376         | 342           | 124           | 29           |
| LAABC                    | Los Angeles County Asian-American Breast Cancer Case-Control Study                                                                  | USA          | 990           | 527           | 138           |              |
| MYBRCA                   | Malaysian Breast Cancer Genetic Study                                                                                               | Malaysia     | 610           | 422           | 291           | 84           |
| SBCGS                    | Shanghai Breast Cancer Genetic Study                                                                                                | China        | 892           | 498           | 271           |              |
| SEBCS                    | Seoul Breast Cancer Study                                                                                                           | Korea        | 1,129         | 622           | 363           | 68           |
| SGBCC                    | Singapore Breast Cancer Cohort                                                                                                      | Singapore    | 502           | 261           | 103           | 41           |
| TBCS                     | IARC-Thai Breast Cancer Study                                                                                                       | Thailand     | 253           | 26            | 26            |              |
| TWBCS                    | Taiwanese Breast Cancer Study                                                                                                       | Taiwan       | 236           | 395           | 179           | 12           |
|                          |                                                                                                                                     | <b>TOTAL</b> | <b>6,624</b>  | <b>3,184</b>  | <b>1,547</b>  | <b>234</b>   |
| <b>African-American</b>  |                                                                                                                                     |              |               |               |               |              |
| NBHS                     | The Nashville Breast Health Study                                                                                                   | USA          | 252           | 176           | 91            | 14           |
| <b>TOTAL ALL STUDIES</b> |                                                                                                                                     |              | <b>86,270</b> | <b>28,587</b> | <b>11,771</b> | <b>4,883</b> |

ER+: Estrogen receptor (ER) positive

ER-: Estrogen receptor (ER) negative

TN: triple-negative

\* These four TNBCC studies only provided controls for other studies and are thus not counted as separate studies.

\*\* These follow up studies were genotyped as part of the TNBCC.

<sup>a</sup> GC-HBOC contains controls only - to be used as controls for SKKDKFZS.

Supplementary Table 2: Conditional analyses of risk of ER-negative breast cancer for the two loci in 1q32.1 (*MDM4* and *LGR6*), and for the two 16q12.2/*FTO* loci (based on BCAC replication data only)

| Locus   | SNP        | OR   | 95% CI |      | <i>P</i>             |            | OR   | 95% CI |      | <i>P</i>             |
|---------|------------|------|--------|------|----------------------|------------|------|--------|------|----------------------|
| 1q32.1  | rs4245739  | 1.14 | 1.09   | 1.19 | $7.0 \times 10^{-9}$ | rs6678914  | 1.08 | 1.04   | 1.12 | $2.2 \times 10^{-4}$ |
| 16q12.2 | rs11075995 | 1.13 | 1.08   | 1.18 | $2.3 \times 10^{-7}$ | rs17817449 | 1.13 | 1.09   | 1.18 | $2.1 \times 10^{-9}$ |

Supplementary Table 3: Genotype-specific odds ratios for the most significant SNPs in the 1q32.1/MDM4, 1q32.1/LGR6, 2p24 and 16q12.2/FTO loci and risk of ER-negative breast cancer (based on BCAC replication data only)

| Rsnnumber/cytoband/gene/<br>position (NCBI build 36) | N Studies | Cases | Controls | OR                                  | 95% CI |      | P value              |
|------------------------------------------------------|-----------|-------|----------|-------------------------------------|--------|------|----------------------|
| <b>Genotypes</b>                                     |           |       |          |                                     |        |      |                      |
| <b>rs4245739 / 1q32.1 / 202785465 / MDM4</b>         |           |       |          |                                     |        |      |                      |
| AA                                                   | 40        | 3,318 | 22,825   | 1.00                                |        |      | Ref.                 |
| AC                                                   |           | 2,637 | 15,798   | 1.13                                | 1.06   | 1.20 | 4.7x10 <sup>-5</sup> |
| CC                                                   |           | 557   | 2,828    | 1.31                                | 1.18   | 1.46 | 3.6x10 <sup>-7</sup> |
| Total                                                |           | 6,512 | 41,451   |                                     |        |      |                      |
|                                                      |           |       |          | P for departure from log-additivity |        |      | 0.666                |
| <b>rs6678914 / 1q32.1 / 200453799 / LGR6</b>         |           |       |          |                                     |        |      |                      |
| AA                                                   | 40        | 1,008 | 7,036    | 1.00                                |        |      | Ref.                 |
| AG                                                   |           | 3,078 | 20,201   | 1.02                                | 0.96   | 1.11 | 0.545                |
| GG                                                   |           | 2,428 | 14,215   | 1.15                                | 1.06   | 1.25 | 1.3x10 <sup>-3</sup> |
| Total                                                |           | 6,514 | 41,452   |                                     |        |      |                      |
|                                                      |           |       |          | P for departure from log-additivity |        |      | 0.138                |
| <b>rs12710696 / 2p24.1 / 19184284</b>                |           |       |          |                                     |        |      |                      |
| GG                                                   | 40        | 2,427 | 17,123   | 1.00                                |        |      | Ref.                 |
| AG                                                   |           | 3,102 | 19,092   | 1.10                                | 1.03   | 1.17 | 0.002                |
| AA                                                   |           | 983   | 5,238    | 1.23                                | 1.13   | 1.34 | 2.3x10 <sup>-6</sup> |
| Total                                                |           | 6,512 | 41,453   |                                     |        |      |                      |
|                                                      |           |       |          | P for departure from log-additivity |        |      | 0.744                |
| <b>rs11075995 / 16q12.2 / 52412792 / FTO</b>         |           |       |          |                                     |        |      |                      |
| AA                                                   | 40        | 3,624 | 23,826   | 1.00                                |        |      | Ref.                 |
| AT                                                   |           | 2,443 | 15,290   | 1.06                                | 1.00   | 1.12 | 0.061                |
| TT                                                   |           | 446   | 2,337    | 1.30                                | 1.16   | 1.46 | 4.4x10 <sup>-6</sup> |
| Total                                                |           | 6,513 | 41,453   |                                     |        |      |                      |
|                                                      |           |       |          | P for departure from log-additivity |        |      | 0.039                |

Supplementary Table 4: Distribution of ER, PR, HER2 and triple-negative status in BCAC replication samples of invasive breast cancer cases of European ancestry with ER data

| Study        | Total         | ER status    |               |       | PR status    |               |              |       | HER2 status   |              |               |       | TN status in ER- cases |              |              |      |
|--------------|---------------|--------------|---------------|-------|--------------|---------------|--------------|-------|---------------|--------------|---------------|-------|------------------------|--------------|--------------|------|
|              |               | Negative     | Positive      | % neg | Negative     | Positive      | Missing      | % neg | Negative      | Positive     | Missing       | % neg | TN                     | non-TN       | Missing      | % TN |
| ABCFS        | 586           | 204          | 382           | 35    | 167          | 419           | 0            | 28    | 0             | 0            | 586           |       | 0                      | 0            | 204          |      |
| ABCS         | 563           | 152          | 411           | 27    | 235          | 325           | 3            | 42    | 332           | 203          | 28            | 62    | 81                     | 66           | 5            | 55   |
| BBCC         | 501           | 47           | 454           | 9     | 115          | 386           | 0            | 23    | 433           | 51           | 17            | 89    | 24                     | 22           | 1            | 52   |
| BBCS         | 601           | 108          | 493           | 18    | 126          | 256           | 219          | 33    | 201           | 50           | 350           | 80    | 29                     | 17           | 62           | 63   |
| BIGGS        | 623           | 147          | 476           | 24    | 126          | 390           | 107          | 24    | 328           | 87           | 208           | 79    | 35                     | 55           | 57           | 39   |
| BSUCH        | 626           | 147          | 479           | 23    | 192          | 432           | 2            | 31    | 495           | 98           | 33            | 83    | 75                     | 65           | 7            | 54   |
| CECILE       | 873           | 130          | 743           | 15    | 249          | 613           | 11           | 29    | 560           | 84           | 229           | 87    | 67                     | 29           | 34           | 70   |
| CGPS         | 2,276         | 357          | 1,919         | 16    | 635          | 1,163         | 478          | 35    | 677           | 110          | 1,489         | 86    | 80                     | 39           | 238          | 67   |
| CNIO-BCS     | 296           | 80           | 216           | 27    | 127          | 158           | 11           | 45    | 153           | 42           | 101           | 78    | 32                     | 22           | 26           | 59   |
| CTS*         | 17            | 17           | 0             |       | 17           | 0             | 0            |       | 17            | 0            | 0             |       | 17                     | 0            | 0            |      |
| DEMOKRITOS*  | 413           | 413          | 0             |       | 413          | 0             | 0            |       | 413           | 0            | 0             |       | 413                    | 0            | 0            |      |
| ESTHER       | 400           | 98           | 302           | 25    | 135          | 257           | 8            | 34    | 126           | 49           | 225           | 72    | 23                     | 18           | 57           | 56   |
| GENICA       | 393           | 66           | 327           | 17    | 90           | 303           | 0            | 23    | 192           | 84           | 117           | 70    | 5                      | 36           | 25           | 12   |
| HEBCS        | 1,444         | 213          | 1,231         | 15    | 455          | 983           | 6            | 32    | 756           | 73           | 615           | 91    | 82                     | 32           | 99           | 72   |
| HMBCS        | 43            | 8            | 35            | 19    | 0            | 0             | 43           |       | 0             | 0            | 43            |       | 0                      | 0            | 8            |      |
| KARBAC       | 401           | 63           | 338           | 16    | 83           | 267           | 51           | 24    | 0             | 0            | 401           |       | 0                      | 0            | 63           |      |
| KBCP         | 377           | 89           | 288           | 24    | 139          | 236           | 2            | 37    | 346           | 23           | 8             | 94    | 60                     | 27           | 2            | 69   |
| LMBC         | 2,447         | 379          | 2,068         | 15    | 568          | 1,866         | 13           | 23    | 1,937         | 295          | 215           | 87    | 215                    | 122          | 42           | 64   |
| MARIE        | 1,486         | 229          | 1,257         | 15    | 412          | 1,073         | 1            | 28    | 1,035         | 285          | 166           | 78    | 51                     | 148          | 30           | 26   |
| MBCSG        | 168           | 40           | 128           | 24    | 51           | 117           | 0            | 30    | 60            | 57           | 51            | 51    | 9                      | 17           | 14           | 35   |
| MCBCS        | 1,394         | 123          | 1,271         | 9     | 263          | 1,130         | 1            | 19    | 970           | 190          | 234           | 84    | 26                     | 71           | 26           | 27   |
| MCCS         | 438           | 88           | 350           | 20    | 141          | 297           | 0            | 32    | 336           | 59           | 43            | 85    | 34                     | 38           | 16           | 47   |
| MEC          | 499           | 87           | 412           | 17    | 132          | 334           | 33           | 28    | 74            | 20           | 33            | 79    | 8                      | 11           | 68           | 42   |
| MTLGBCS      | 485           | 64           | 421           | 13    | 127          | 357           | 1            | 26    | 422           | 49           | 14            | 90    | 45                     | 17           | 2            | 73   |
| NBCS*        | 22            | 22           | 0             |       | 22           | 0             | 0            |       | 21            | 0            | 1             |       | 21                     | 0            | 1            |      |
| NBHS*        | 125           | 125          | 0             |       | 125          | 0             | 0            |       | 125           | 0            | 0             |       | 125                    | 0            | 0            |      |
| OBCS         | 500           | 97           | 403           | 19    | 144          | 355           | 1            | 29    | 431           | 69           | 0             | 86    | 62                     | 35           | 0            | 64   |
| OFBCR        | 896           | 266          | 630           | 30    | 339          | 534           | 23           | 39    | 0             | 0            | 896           |       | 0                      | 0            | 266          |      |
| ORIGO        | 279           | 68           | 211           | 24    | 85           | 144           | 50           | 37    | 9             | 0            | 270           |       | 5                      | 0            | 63           |      |
| OSUCCG*      | 207           | 207          | 0             |       | 207          | 0             | 0            |       | 207           | 0            | 0             |       | 207                    | 0            | 0            |      |
| RBCS         | 491           | 125          | 366           | 25    | 146          | 271           | 74           | 35    | 69            | 10           | 412           | 87    | 11                     | 2            | 112          | 85   |
| RPCI*        | 47            | 47           | 0             |       | 47           | 0             | 0            |       | 47            | 0            | 0             |       | 47                     | 0            | 0            |      |
| SASBAC       | 241           | 43           | 198           | 18    | 67           | 168           | 6            | 29    | 0             | 0            | 241           |       | 0                      | 0            | 43           |      |
| SBCS         | 445           | 89           | 356           | 20    | 65           | 109           | 271          | 37    | 188           | 4            | 253           | 98    | 17                     | 14           | 58           | 55   |
| SEARCH       | 6,276         | 1,163        | 5,113         | 19    | 898          | 2,138         | 3,240        | 30    | 2,730         | 107          | 3,439         | 96    | 400                    | 169          | 594          | 70   |
| SKK(DKFZS)*  | 134           | 134          | 0             |       | 134          | 0             | 0            |       | 134           | 0            | 0             |       | 134                    | 0            | 0            |      |
| SZBCS        | 200           | 51           | 149           | 26    | 26           | 93            | 81           | 22    | 49            | 55           | 96            | 47    | 6                      | 10           | 35           | 38   |
| UKBGS        | 106           | 18           | 88            | 17    | 23           | 54            | 29           | 30    | 31            | 7            | 68            | 82    | 3                      | 1            | 14           | 75   |
| kConFab/AOCS | 173           | 47           | 126           | 27    | 45           | 108           | 20           | 29    | 102           | 15           | 56            | 87    | 18                     | 11           | 18           | 62   |
| pKARMA       | 4,249         | 663          | 3,586         | 16    | 1,246        | 2,923         | 80           | 30    | 0             | 0            | 4,249         |       | 0                      | 0            | 663          |      |
| <b>Total</b> | <b>31,741</b> | <b>6,514</b> | <b>25,227</b> |       | <b>8,617</b> | <b>18,259</b> | <b>4,865</b> |       | <b>14,006</b> | <b>2,176</b> | <b>15,559</b> |       | <b>2,467</b>           | <b>1,094</b> | <b>2,953</b> |      |

Table includes only invasive breast cancer cases in iCOGS with data on ER status (i.e. 9,354 invasive breast cancer cases in iCOGS with missing ER data (21% of all cases) are excluded from this table. \* Studies including only triple-negative cases (Part of TNBCC). GC-HBOC not shown because it has only controls to be used as controls for SKKDKFZS.

Supplementary Table 5: Association with risk of breast cancer for most significant SNPs in the 1q32.1/*MDM4*, 1q32.1/*LGR6*, 2p24 and 16q12.2/*FTO* loci, stratified by breast cancer tumour subtypes

| rsnumber/cytoband/position /neighbourhood genes     | Consortium       | N Studies | Cases  | Controls | OR   | 95% CI |      | P value              |
|-----------------------------------------------------|------------------|-----------|--------|----------|------|--------|------|----------------------|
| <b>rs4245739/1q32.1/202785465/<i>MDM4</i></b>       |                  |           |        |          |      |        |      |                      |
| All cases vs controls                               | BCAC/iCOGS       | 40        | 41,090 | 41,451   | 1.02 | 1.00   | 1.04 | 0.080                |
| ER+ cases vs controls                               | BCAC/iCOGS       | 33        | 25,225 | 40,600   | 0.99 | 0.97   | 1.02 | 0.563                |
| ER- cases vs controls                               | BCAC/iCOGS       | 40        | 6,512  | 41,451   | 1.14 | 1.09   | 1.19 | 5.6x10 <sup>-9</sup> |
| ER- vs ER+ cases                                    | BCAC/iCOGS       | 33        | 5,547  | 25,225   | 0.88 | 0.84   | 0.92 | 2.8x10 <sup>-8</sup> |
| TN cases vs controls                                | BCAC/iCOGS       | 34        | 2,465  | 33,400   | 1.17 | 1.09   | 1.26 | 3.1x10 <sup>-5</sup> |
| non-TN ER- cases vs controls                        | BCAC/iCOGS       | 26        | 1,094  | 32,222   | 1.02 | 0.92   | 1.12 | 0.711                |
| TN cases vs non-TN ER- cases                        | BCAC/iCOGS       | 26        | 1,496  | 1,094    | 1.11 | 0.98   | 1.27 | 0.103                |
|                                                     | BPC3             | 5         | 606    | 429      | 1.31 | 1.07   | 1.60 | 0.009                |
|                                                     | <i>Combined</i>  |           |        |          |      |        |      |                      |
|                                                     | <i>BCAC+BPC3</i> | 31        | 2,102  | 1,523    | 1.17 | 1.05   | 1.30 | 0.005                |
| <b>rs6678914 / 1q32.1 / 200453799 / <i>LGR6</i></b> |                  |           |        |          |      |        |      |                      |
| All cases vs controls                               | BCAC/iCOGS       | 40        | 41,090 | 41,452   | 1.00 | 0.98   | 1.02 | 0.857                |
| ER+ cases vs controls                               | BCAC/iCOGS       | 33        | 25,223 | 40,601   | 0.99 | 0.96   | 1.01 | 0.212                |
| ER- cases vs controls                               | BCAC/iCOGS       | 40        | 6,514  | 41,452   | 1.08 | 1.04   | 1.12 | 1.6x10 <sup>-4</sup> |
| ER- vs ER+ cases                                    | BCAC/iCOGS       | 33        | 5,549  | 25,223   | 0.90 | 1.00   | 0.94 | 1.6x10 <sup>-6</sup> |
| TN cases vs controls                                | BCAC/iCOGS       | 34        | 2,467  | 33,400   | 1.03 | 0.96   | 1.10 | 0.414                |
| non-TN ER- cases vs controls                        | BCAC/iCOGS       | 26        | 1,094  | 32,222   | 1.11 | 1.01   | 1.21 | 0.027                |
| TN cases vs non-TN ER- cases                        | BCAC/iCOGS       | 26        | 1,498  | 1,094    | 0.97 | 0.86   | 1.09 | 0.603                |
|                                                     | BPC3             | 5         | 606    | 429      | 1.02 | 0.85   | 1.21 | 0.869                |
|                                                     | <i>Combined</i>  |           |        |          |      |        |      |                      |
|                                                     | <i>BCAC+BPC3</i> | 31        | 2,104  | 1,523    | 0.98 | 0.89   | 1.09 | 0.734                |
| <b>rs12710696 /2p24.1/19184284</b>                  |                  |           |        |          |      |        |      |                      |
| All cases vs controls                               | BCAC/iCOGS       | 40        | 41,090 | 41,453   | 1.04 | 1.01   | 1.06 | 9.7x10 <sup>-4</sup> |
| ER+ cases vs controls                               | BCAC/iCOGS       | 33        | 25,225 | 40,602   | 1.01 | 0.98   | 1.03 | 0.534                |
| ER- cases vs controls                               | BCAC/iCOGS       | 40        | 6,512  | 41,453   | 1.11 | 1.06   | 1.15 | 1.0x10 <sup>-6</sup> |
| ER- vs ER+ cases                                    | BCAC/iCOGS       | 33        | 5,547  | 25,225   | 0.91 | 0.87   | 0.95 | 2.7x10 <sup>-5</sup> |
| TN cases vs controls                                | BCAC/iCOGS       | 34        | 2,466  | 33,401   | 1.15 | 1.07   | 1.23 | 6.7x10 <sup>-5</sup> |
| non-TN ER- cases vs controls                        | BCAC/iCOGS       | 26        | 1,094  | 32,223   | 1.16 | 1.06   | 1.26 | 0.001                |
| TN cases vs non-TN ER- cases                        | BCAC/iCOGS       | 26        | 1,497  | 1,094    | 0.98 | 0.87   | 1.11 | 0.802                |
|                                                     | BPC3             | 5         | 606    | 429      | 0.91 | 0.76   | 1.10 | 0.342                |
|                                                     | <i>Combined</i>  |           |        |          |      |        |      |                      |
|                                                     | <i>BCAC+BPC3</i> | 31        | 2,103  | 1,523    | 0.96 | 0.87   | 1.07 | 0.468                |
| <b>rs11075995 /16q12.2 / 52412792 / <i>FTO</i></b>  |                  |           |        |          |      |        |      |                      |
| All cases vs controls                               | BCAC/iCOGS       | 40        | 41,085 | 41,453   | 1.04 | 1.02   | 1.06 | 7.5x10 <sup>-4</sup> |
| ER+ cases vs controls                               | BCAC/iCOGS       | 33        | 25,220 | 40,602   | 1.02 | 1.00   | 1.05 | 0.083                |
| ER- cases vs controls                               | BCAC/iCOGS       | 40        | 6,513  | 41,453   | 1.10 | 1.05   | 1.15 | 3.6x10 <sup>-5</sup> |
| ER- vs ER+ cases                                    | BCAC/iCOGS       | 33        | 5,548  | 25,220   | 0.93 | 0.89   | 0.98 | 0.003                |
| TN cases vs controls                                | BCAC/iCOGS       | 34        | 2,466  | 33,401   | 1.11 | 1.03   | 1.20 | 0.007                |
| non-TN ER- cases vs controls                        | BCAC/iCOGS       | 26        | 1,094  | 32,223   | 1.13 | 1.02   | 1.25 | 0.016                |
| TN cases vs non-TN ER- cases                        | BCAC/iCOGS       | 26        | 1,497  | 1,094    | 1.04 | 0.91   | 1.19 | 0.547                |
|                                                     | BPC3             | 5         | 606    | 429      | 1.14 | 0.93   | 1.41 | 0.210                |
|                                                     | <i>Combined</i>  |           |        |          |      |        |      |                      |
|                                                     | <i>BCAC+BPC3</i> | 31        | 2,103  | 1,523    | 1.07 | 0.91   | 1.19 | 0.239                |

Supplementary Table 6: Association with risk of ER-negative breast cancer for most significant SNPs in the 1q32.1/MDM4, 1q32.1/LGR6, 2p24 and 16q12.2/FTO loci in populations of Asian and African ancestry

| Rsnumber /cytoband / gene / position (NCBI build 36) – risk allele/reference allele | T/I | Ethnicity      | N Studies | Cases       | Controls    | RAF  | OR          | 95% CI           | P            | P test for difference in OR compared to Europeans |
|-------------------------------------------------------------------------------------|-----|----------------|-----------|-------------|-------------|------|-------------|------------------|--------------|---------------------------------------------------|
| <b>rs4245739/1q32.1/MDM4/ 202,785,465 –C/A</b>                                      |     |                |           |             |             |      |             |                  |              |                                                   |
| AABC                                                                                | T   | African        | 9         | 1,004       | 2,773       | 0.24 | 1.07        | 0.95 1.21        | 0.291        |                                                   |
| BCAC                                                                                | T   | African        | 1         | 91          | 252         | 0.23 | 1.22        | 0.83 1.79        | 0.304        |                                                   |
| <b>Meta-analysis in Africans</b>                                                    |     | <b>African</b> | <b>10</b> | <b>1095</b> | <b>3025</b> |      | <b>1.08</b> | <b>0.96 1.22</b> | <b>0.186</b> | <b>0.440</b>                                      |
| BCAC                                                                                | T   | Asian          | 9         | 1547        | 6622        | 0.06 | 0.97        | 0.81 1.16        | 0.723        | 0.086                                             |
| <b>rs6678914 / 1q32.1/LGR6 /200,453,799 – G/A</b>                                   |     |                |           |             |             |      |             |                  |              |                                                   |
| AABC                                                                                | T   | African        | 9         | 1,004       | 2,773       | 0.67 | 1.00        | 0.89 1.12        | 0.988        |                                                   |
| BCAC                                                                                | T   | African        | 1         | 91          | 252         | 0.67 | 0.90        | 0.62 1.31        | 0.573        |                                                   |
| <b>Meta-analysis in Africans</b>                                                    |     | <b>African</b> | <b>10</b> | <b>1095</b> | <b>3025</b> |      | <b>0.99</b> | <b>0.89 1.10</b> | <b>0.882</b> | <b>0.076</b>                                      |
| BCAC                                                                                | T   | Asian          | 9         | 1547        | 6623        | 0.76 | 1.04        | 0.95 1.15        | 0.385        | 0.330                                             |
| <b>rs12710696 /2p24.1/ 19,184,284 – T/C</b>                                         |     |                |           |             |             |      |             |                  |              |                                                   |
| AABC                                                                                | I   | African        | 9         | 1,004       | 2,773       | 0.54 | 1.00        | 0.90 1.11        | 0.997        |                                                   |
| BCAC                                                                                | T   | African        | 1         | 91          | 252         | 0.52 | 0.91        | 0.65 1.28        | 0.601        |                                                   |
| <b>Meta-analysis in Africans</b>                                                    |     | <b>African</b> | <b>10</b> | <b>1095</b> | <b>3025</b> |      | <b>0.99</b> | <b>0.90 1.10</b> | <b>0.875</b> | <b>0.065</b>                                      |
| BCAC/iCOGS                                                                          | T   | Asian          | 9         | 1547        | 6623        | 0.33 | 1.05        | 0.96 1.14        | 0.295        | 0.339                                             |
| <b>rs11075995 /16q12.2 / FTO, KIAA1752 / 52,412,792 –A/T</b>                        |     |                |           |             |             |      |             |                  |              |                                                   |
| AABC                                                                                | I   | African        | 9         | 1,004       | 2,773       | 0.19 | 1.13        | 0.98 1.29        | 0.087        |                                                   |
| BCAC                                                                                | T   | African        | 1         | 21          | 252         | 0.15 | 1.32        | 0.81 2.14        | 0.262        |                                                   |
| <b>Meta-analysis in Africans</b>                                                    |     | <b>African</b> | <b>9</b>  | <b>1025</b> | <b>3025</b> |      | <b>1.14</b> | <b>1.00 1.30</b> | <b>0.050</b> | <b>0.688</b>                                      |
| BCAC                                                                                | T   | Asian          | 9         | 1547        | 6623        | 0.30 | 1.03        | 0.94 1.13        | 0.489        | 0.135                                             |

I/T indicates imputed and typed SNPs. RAF: risk allele frequency. P-study het.: Q-test for study heterogeneity of estimated ORs.

Estimates for Europeans (meta-analysis) are shown in Table 1.

Supplementary Table 7: Association with risk of ER-negative breast cancer risk for most significant SNPs in the 1q32.1/MDM4, 1q32.1/LGR6, 2p24 and 16q12.2/FTO loci, stratified by 5-year age categories (based on BCAC replication data in studies of European ancestry).

| RS number<br>Age category, years | ER- vs controls |          |      |       |      |                                   | P-het |
|----------------------------------|-----------------|----------|------|-------|------|-----------------------------------|-------|
|                                  | ER-             | Controls | OR   | 95%CI |      | P                                 |       |
| <b>rs4245739</b>                 |                 |          |      |       |      |                                   |       |
| <40                              | 531             | 3,791    | 1.28 | 1.11  | 1.49 | 0.001                             | 0.008 |
| 40-<45                           | 526             | 3,433    | 1.15 | 0.99  | 1.34 | 0.076                             | 0.138 |
| 45-<50                           | 583             | 4,433    | 1.14 | 0.99  | 1.31 | 0.073                             | 0.144 |
| 50-<55                           | 775             | 6,354    | 1.17 | 1.04  | 1.32 | 0.010                             | 0.055 |
| 55-<60                           | 827             | 6,198    | 0.99 | 0.88  | 1.12 | 0.875                             | Ref.  |
| 60-<65                           | 779             | 5,558    | 1.10 | 0.98  | 1.24 | 0.119                             | 0.227 |
| 65-<70                           | 567             | 4,529    | 1.19 | 1.04  | 1.37 | 0.014                             | 0.049 |
| >=70                             | 582             | 3,732    | 1.00 | 0.87  | 1.16 | 0.977                             | 0.902 |
| Total                            | 5,170           | 38,028   |      |       |      | <i>P trend in ER- cases=0.314</i> |       |
| <b>rs6678914</b>                 |                 |          |      |       |      |                                   |       |
| <40                              | 532             | 3,791    | 1.00 | 0.87  | 1.15 | 0.382                             | 0.063 |
| 40-<45                           | 526             | 3,433    | 1.03 | 0.90  | 1.18 | 0.508                             | 0.118 |
| 45-<50                           | 583             | 4,434    | 1.11 | 0.98  | 1.27 | 0.900                             | 0.469 |
| 50-<55                           | 775             | 6,354    | 1.17 | 1.05  | 1.31 | 0.994                             | 0.873 |
| 55-<60                           | 827             | 6,197    | 1.19 | 1.06  | 1.32 | 0.998                             | Ref.  |
| 60-<65                           | 779             | 5,558    | 1.05 | 0.94  | 1.17 | 0.670                             | 0.125 |
| 65-<70                           | 567             | 4,530    | 1.09 | 0.96  | 1.24 | 0.838                             | 0.346 |
| >=70                             | 582             | 3,732    | 1.04 | 0.91  | 1.19 | 0.593                             | 0.146 |
| Total                            | 5,171           | 38,029   |      |       |      | <i>P trend in ER- cases=0.315</i> |       |
| <b>rs12710696</b>                |                 |          |      |       |      |                                   |       |
| <40                              | 531             | 3,790    | 1.14 | 0.99  | 1.31 | 0.067                             | 0.560 |
| 40-<45                           | 526             | 3,433    | 1.09 | 0.95  | 1.25 | 0.225                             | 0.916 |
| 45-<50                           | 583             | 4,434    | 1.11 | 0.97  | 1.26 | 0.124                             | 0.769 |
| 50-<55                           | 774             | 6,354    | 1.15 | 1.03  | 1.29 | 0.014                             | 0.427 |
| 55-<60                           | 827             | 6,199    | 1.08 | 0.97  | 1.21 | 0.179                             | Ref.  |
| 60-<65                           | 779             | 5,558    | 1.17 | 1.05  | 1.31 | 0.005                             | 0.302 |
| 65-<70                           | 567             | 4,529    | 1.06 | 0.93  | 1.21 | 0.417                             | 0.807 |
| >=70                             | 582             | 3,732    | 1.06 | 0.93  | 1.21 | 0.392                             | 0.832 |
| Total                            | 5,169           | 38,029   |      |       |      | <i>P trend in ER- cases=0.694</i> |       |
| <b>rs11075995</b>                |                 |          |      |       |      |                                   |       |
| <40                              | 532             | 3,791    | 1.07 | 0.91  | 1.25 | 0.423                             | 0.852 |
| 40-<45                           | 526             | 3,433    | 1.20 | 1.03  | 1.40 | 0.018                             | 0.165 |
| 45-<50                           | 582             | 4,433    | 0.95 | 0.82  | 1.10 | 0.502                             | 0.327 |
| 50-<55                           | 775             | 6,354    | 1.08 | 0.96  | 1.23 | 0.215                             | 0.711 |
| 55-<60                           | 827             | 6,199    | 1.05 | 0.93  | 1.18 | 0.468                             | Ref.  |
| 60-<65                           | 779             | 5,558    | 1.11 | 0.98  | 1.26 | 0.115                             | 0.537 |
| 65-<70                           | 567             | 4,529    | 1.27 | 1.10  | 1.46 | 0.001                             | 0.044 |
| >=70                             | 582             | 3,732    | 1.19 | 1.03  | 1.37 | 0.020                             | 0.193 |
| Total                            | 5,170           | 38,029   |      |       |      | <i>P trend in ER- cases=0.841</i> |       |



Supplementary Table 8: Association with risk of ER-negative breast cancer risk for most significant SNPs in the 1q32.1/MDM4, 1q32.1/LGR6, 2p24 and 16q12.2/FTO loci, stratified by family history (FH) of breast cancer in first degree relatives (based on iCOGS data from studies of European ancestry)

| Family History    | ER + vs controls |          |      |       |      |       |       | ER- vs controls |          |      |       |      | FH+ vs FH- in ER- cases |      |       |      |       |
|-------------------|------------------|----------|------|-------|------|-------|-------|-----------------|----------|------|-------|------|-------------------------|------|-------|------|-------|
|                   | ER+              | Controls | OR   | 95%CI | P    | P-het |       | ER-             | Controls | OR   | 95%CI | P    |                         | OR   | 95%CI | P    |       |
| <b>rs4245739</b>  |                  |          |      |       |      |       |       |                 |          |      |       |      |                         |      |       |      |       |
| No                | 8,783            | 15,317   | 0.99 | 0.95  | 1.03 | 0.575 | Ref.  | 2,121           | 15,440   | 1.21 | 1.12  | 1.30 | 3.1x10 <sup>-7</sup>    |      |       |      | Ref.  |
| Yes               | 2,403            | 1,891    | 0.95 | 0.86  | 1.05 | 0.305 | 0.473 | 490             | 1,919    | 1.01 | 0.86  | 1.19 | 0.885                   | 0.91 | 0.80  | 1.04 | 0.172 |
| Total             | 11,186           | 17,208   |      |       |      |       |       | 2,611           | 17,359   |      |       |      |                         |      |       |      |       |
| <b>rs6678914</b>  |                  |          |      |       |      |       |       |                 |          |      |       |      |                         |      |       |      |       |
| No                | 8,783            | 15,318   | 1.00 | 0.96  | 1.03 | 0.809 | Ref.  | 2,121           | 15,441   | 1.13 | 1.06  | 1.21 | 2.7x10 <sup>-4</sup>    |      |       |      | Ref.  |
| Yes               | 2,403            | 1,891    | 0.98 | 0.89  | 1.07 | 0.632 | 0.731 | 491             | 1,919    | 0.97 | 0.84  | 1.12 | 0.684                   | 0.89 | 0.79  | 1.00 | 0.049 |
| Total             | 11,186           | 17,209   |      |       |      |       |       | 2,612           | 17,360   |      |       |      |                         |      |       |      |       |
| <b>rs12710696</b> |                  |          |      |       |      |       |       |                 |          |      |       |      |                         |      |       |      |       |
| No                | 8,782            | 15,318   | 1.01 | 0.97  | 1.05 | 0.758 | Ref.  | 2,120           | 15,441   | 1.13 | 1.05  | 1.21 | 0.001                   |      |       |      | Ref.  |
| Yes               | 2,403            | 1,891    | 1.04 | 0.95  | 1.14 | 0.408 | 0.523 | 491             | 1,919    | 1.12 | 0.97  | 1.30 | 0.134                   | 0.98 | 0.87  | 1.10 | 0.719 |
| Total             | 11,185           | 17,209   |      |       |      |       |       | 2,611           | 17,360   |      |       |      |                         |      |       |      |       |
| <b>rs12710696</b> |                  |          |      |       |      |       |       |                 |          |      |       |      |                         |      |       |      |       |
| No                | 8,783            | 15,316   | 1.05 | 1.00  | 1.10 | 0.043 | Ref.  | 2,121           | 15,439   | 1.12 | 1.04  | 1.21 | 0.003                   |      |       |      | Ref.  |
| Yes               | 2,403            | 1,891    | 1.04 | 0.94  | 1.15 | 0.478 | 0.886 | 491             | 1,919    | 1.10 | 0.93  | 1.30 | 0.283                   | 0.98 | 0.86  | 1.12 | 0.773 |
| Total             | 11,186           | 17,207   |      |       |      |       |       | 2,612           | 17,358   |      |       |      |                         |      |       |      |       |

Supplementary Table 9: Association with risk of ER-negative breast cancer for known breast cancer risk loci in populations of European ancestry (meta-analysis of BPC3, TNBCC, Combined ER-negative GWAS and BCAC replication data in studies of European ancestry). SNPs with P<0.05 are shown in bold.

| Cytoband                                                                        | Locus                              | RS number         | Position         | Minor Allele | Other Allele | MAF          | OR          | (95% C.I.)  |             | P                           |
|---------------------------------------------------------------------------------|------------------------------------|-------------------|------------------|--------------|--------------|--------------|-------------|-------------|-------------|-----------------------------|
| <b>Previously reported loci<sup>1</sup></b>                                     |                                    |                   |                  |              |              |              |             |             |             |                             |
| 1p11.2                                                                          |                                    | rs11249433        | 120982136        | G            | A            | 0.405        | 1.00        | 0.97        | 1.04        | 0.796                       |
| 2q33.1                                                                          | <b>CASP8</b>                       | <b>rs1045485</b>  | <b>201857834</b> | C            | G            | <b>0.115</b> | <b>0.94</b> | <b>0.89</b> | <b>0.98</b> | <b>0.008</b>                |
| 2q35                                                                            |                                    | <b>rs13387042</b> | <b>217614077</b> | G            | A            | <b>0.489</b> | <b>0.95</b> | <b>0.92</b> | <b>0.98</b> | <b>0.002</b>                |
| 3p24.1                                                                          | <b>SLC4A7</b>                      | <b>rs4973768</b>  | <b>27391017</b>  | T            | C            | <b>0.472</b> | <b>1.04</b> | <b>1.01</b> | <b>1.07</b> | <b>0.018</b>                |
| 5p15.33                                                                         | <b>TERT</b>                        | <b>rs10069690</b> | <b>1332790</b>   | T            | C            | <b>0.321</b> | <b>1.15</b> | <b>1.11</b> | <b>1.20</b> | <b>4.5x10<sup>-12</sup></b> |
| 5p12                                                                            |                                    | <b>rs10941679</b> | <b>44742255</b>  | G            | A            | <b>0.338</b> | <b>1.04</b> | <b>1.00</b> | <b>1.08</b> | <b>0.029</b>                |
| 5q11.2                                                                          | <b>MAP3K1</b>                      | <b>rs889312</b>   | <b>56067641</b>  | C            | A            | <b>0.334</b> | <b>1.05</b> | <b>1.01</b> | <b>1.09</b> | <b>0.006</b>                |
| 6q14.1                                                                          |                                    | <b>rs17530068</b> | <b>82249828</b>  | C            | T            | <b>0.237</b> | <b>1.09</b> | <b>1.05</b> | <b>1.13</b> | <b>3.3x10<sup>-6</sup></b>  |
| 6q25.1                                                                          | <b>ESR1</b>                        | <b>rs3757318</b>  | <b>151955806</b> | A            | G            | <b>0.071</b> | <b>1.22</b> | <b>1.15</b> | <b>1.30</b> | <b>2.5x10<sup>-11</sup></b> |
| 6q25.1                                                                          | <b>ESR1</b>                        | <b>rs2046210</b>  | <b>151990059</b> | A            | G            | <b>0.423</b> | <b>1.15</b> | <b>1.11</b> | <b>1.19</b> | <b>4.9x10<sup>-16</sup></b> |
| 8q24.21                                                                         |                                    | rs13281615        | 128424800        | G            | A            | 0.411        | 1.03        | 0.99        | 1.06        | 0.113                       |
| 9p21.3                                                                          | <b>CDKN2A/B</b>                    | <b>rs1011970</b>  | <b>22052134</b>  | T            | G            | <b>0.169</b> | <b>1.09</b> | <b>1.05</b> | <b>1.14</b> | <b>3.9x10<sup>-5</sup></b>  |
| 9q31.2                                                                          |                                    | rs865686          | 109928299        | G            | T            | 0.377        | 0.98        | 0.95        | 1.02        | 0.325                       |
| 10p15.1                                                                         | <b>ANKRD16</b>                     | rs2380205         | 5926740          | T            | C            | 0.440        | 1.00        | 0.97        | 1.03        | 0.903                       |
| 10q21.2                                                                         | <b>ZNF365</b>                      | <b>rs10995190</b> | <b>63948688</b>  | A            | G            | <b>0.154</b> | <b>0.89</b> | <b>0.85</b> | <b>0.93</b> | <b>1.3x10<sup>-7</sup></b>  |
| 10q22.3                                                                         | <b>ZMIZ1</b>                       | <b>rs704010</b>   | <b>80511154</b>  | T            | C            | <b>0.383</b> | <b>1.05</b> | <b>1.01</b> | <b>1.08</b> | <b>0.006</b>                |
| 10q26.13                                                                        | <b>FGFR2</b>                       | rs2981579         | 123327325        | A            | G            | 0.410        | 1.02        | 0.99        | 1.05        | 0.273                       |
| 11p15.5                                                                         | <b>LSP1</b>                        | <b>rs3817198</b>  | <b>1865582</b>   | G            | A            | <b>0.312</b> | <b>1.06</b> | <b>1.02</b> | <b>1.09</b> | <b>0.002</b>                |
| 11q13.3                                                                         |                                    | rs614367          | 69037945         | T            | C            | 0.150        | 1.03        | 0.98        | 1.07        | 0.224                       |
| 12p11.22                                                                        | <b>PTHLH</b>                       | <b>rs10771399</b> | <b>28046347</b>  | C            | T            | <b>0.105</b> | <b>0.83</b> | <b>0.79</b> | <b>0.87</b> | <b>2.4x10<sup>-12</sup></b> |
| 12q24.21                                                                        |                                    | rs1292011         | 114320905        | G            | A            | 0.420        | 0.99        | 0.96        | 1.02        | 0.443                       |
| 14q24.1                                                                         | <b>RAD51L1</b>                     | <b>rs999737</b>   | <b>68104435</b>  | A            | G            | <b>0.234</b> | <b>0.94</b> | <b>0.91</b> | <b>0.98</b> | <b>0.001</b>                |
| 16q12.1                                                                         | <b>TOX3</b>                        | <b>rs3803662</b>  | <b>51143842</b>  | T            | C            | <b>0.267</b> | <b>1.14</b> | <b>1.10</b> | <b>1.18</b> | <b>5.5x10<sup>-13</sup></b> |
| 17q22                                                                           | <b>COX11</b>                       | <b>rs6504950</b>  | <b>50411470</b>  | A            | G            | <b>0.364</b> | <b>0.96</b> | <b>0.93</b> | <b>0.99</b> | <b>0.024</b>                |
| 19p13.11                                                                        | <b>MERIT40</b>                     | <b>rs8170</b>     | <b>17250704</b>  | A            | G            | <b>0.191</b> | <b>1.15</b> | <b>1.11</b> | <b>1.20</b> | <b>9.3x10<sup>-13</sup></b> |
| 21q21.1                                                                         | <b>NRIP1</b>                       | rs2823093         | 15442703         | A            | G            | 0.268        | 0.99        | 0.96        | 1.03        | 0.595                       |
| <b>Newly identified loci (Michailidou, K. et al. Nature Genetics, In Press)</b> |                                    |                   |                  |              |              |              |             |             |             |                             |
| <b>PTPN22:BCL2L15:</b>                                                          |                                    |                   |                  |              |              |              |             |             |             |                             |
| 1p13.2                                                                          | <b>AP4B1:DCLE1B:HIPK1</b>          | <b>rs11552449</b> | <b>114249912</b> | T            | C            | <b>0.266</b> | <b>1.06</b> | <b>1.01</b> | <b>1.10</b> | <b>0.009</b>                |
| 1p36.22                                                                         | <b>PEX14</b>                       | <b>rs616488</b>   | <b>10488802</b>  | G            | A            | <b>0.335</b> | <b>0.91</b> | <b>0.88</b> | <b>0.94</b> | <b>1.0x10<sup>-8</sup></b>  |
| 2q14.2                                                                          |                                    | <b>rs4849887</b>  | <b>120961592</b> | T            | C            | <b>0.099</b> | <b>0.93</b> | <b>0.88</b> | <b>0.99</b> | <b>0.013</b>                |
| 2q31.1                                                                          | <b>METAP1D:DLX1:DLX2</b>           | rs2016394         | 172681217        | A            | G            | 0.475        | 1.00        | 0.97        | 1.04        | 0.854                       |
| 2q31.1                                                                          | <b>CDCA7</b>                       | rs1550623         | 173921140        | G            | A            | 0.160        | 0.96        | 0.92        | 1.00        | 0.051                       |
| 2q35                                                                            | <b>DIRC3</b>                       | <b>rs16857609</b> | <b>218004753</b> | T            | C            | <b>0.229</b> | <b>1.07</b> | <b>1.04</b> | <b>1.11</b> | <b>1.0x10<sup>-4</sup></b>  |
| 3p26.1                                                                          | <b>ITPR1:EGOT</b>                  | rs6762644         | 4717276          | G            | A            | 0.395        | 1.01        | 0.98        | 1.04        | 0.572                       |
| 3p24.1                                                                          | <b>TGFBR2</b>                      | rs12493607        | 30657943         | C            | G            | 0.422        | 1.00        | 0.97        | 1.04        | 0.830                       |
| 4q24                                                                            | <b>TET2</b>                        | <b>rs9790517</b>  | <b>106304227</b> | T            | C            | <b>0.316</b> | <b>1.04</b> | <b>1.00</b> | <b>1.08</b> | <b>0.028</b>                |
| 4q34.1                                                                          | <b>ADAM29</b>                      | rs6828523         | 176083001        | A            | C            | 0.216        | 0.99        | 0.95        | 1.04        | 0.774                       |
| 5q11.2                                                                          | <b>RAB3C</b>                       | <b>rs10472076</b> | <b>58219818</b>  | C            | T            | <b>0.332</b> | <b>1.04</b> | <b>1.01</b> | <b>1.08</b> | <b>0.015</b>                |
| 5q11.2                                                                          | <b>PDE4D,PDE4DN2</b>               | <b>rs1353747</b>  | <b>58373238</b>  | G            | T            | <b>0.096</b> | <b>0.95</b> | <b>0.90</b> | <b>1.00</b> | <b>0.046</b>                |
| 5q33.3                                                                          | <b>EBF1</b>                        | <b>rs1432679</b>  | <b>158176661</b> | C            | T            | <b>0.435</b> | <b>1.08</b> | <b>1.04</b> | <b>1.11</b> | <b>6.7x10<sup>-6</sup></b>  |
| 6p25.3                                                                          | <b>FOXQ1</b>                       | <b>rs11242675</b> | <b>1263878</b>   | C            | T            | <b>0.382</b> | <b>0.95</b> | <b>0.91</b> | <b>0.98</b> | <b>0.001</b>                |
| 6p23                                                                            | <b>RABBP9</b>                      | rs204247          | 13830502         | G            | A            | 0.439        | 1.02        | 0.99        | 1.06        | 0.134                       |
| 7q35                                                                            | <b>ARHGEF5:NOBOX</b>               | rs1240475         | 143705862        | A            | G            | 0.255        | 1.01        | 0.97        | 1.05        | 0.587                       |
| 8p12                                                                            |                                    | <b>rs9693444</b>  | <b>29565535</b>  | A            | C            | <b>0.324</b> | <b>1.06</b> | <b>1.02</b> | <b>1.09</b> | <b>0.001</b>                |
| 8q21.11                                                                         |                                    | <b>rs6472903</b>  | <b>76392856</b>  | G            | T            | <b>0.277</b> | <b>0.95</b> | <b>0.91</b> | <b>0.99</b> | <b>0.016</b>                |
| 8q21.11                                                                         | <b>HNF4G</b>                       | <b>rs2943559</b>  | <b>76580492</b>  | G            | A            | <b>0.194</b> | <b>1.12</b> | <b>1.05</b> | <b>1.18</b> | <b>2.5x10<sup>-4</sup></b>  |
| 8q24.21                                                                         | <b>MIR1208</b>                     | <b>rs11780156</b> | <b>129263823</b> | T            | C            | <b>0.167</b> | <b>1.05</b> | <b>1.00</b> | <b>1.09</b> | <b>0.037</b>                |
| 9q31.2                                                                          |                                    | rs10759243        | 109345936        | A            | C            | 0.262        | 1.04        | 1.00        | 1.07        | 0.057                       |
| 10p12.31                                                                        | <b>MLLT10:DNAJC1</b>               | rs7072776         | 22072948         | A            | G            | 0.285        | 0.98        | 0.95        | 1.02        | 0.322                       |
| 10p12.31                                                                        | <b>DNAJC1</b>                      | <b>rs11814448</b> | <b>22355849</b>  | C            | A            | <b>0.132</b> | <b>1.20</b> | <b>1.08</b> | <b>1.35</b> | <b>0.001</b>                |
| 10q25.2                                                                         | <b>TCF7L2</b>                      | <b>rs7904519</b>  | <b>114763917</b> | G            | A            | <b>0.462</b> | <b>1.06</b> | <b>1.03</b> | <b>1.09</b> | <b>2.9x10<sup>-4</sup></b>  |
| 10q26.12                                                                        |                                    | rs11199914        | 123083891        | T            | C            | 0.320        | 1.01        | 0.97        | 1.04        | 0.741                       |
| <b>DKFZp761E198:OVOL1:SNX32:CF L1:MUS81</b>                                     |                                    |                   |                  |              |              |              |             |             |             |                             |
| 11q13.1                                                                         |                                    | <b>rs3903072</b>  | <b>65339642</b>  | T            | G            | <b>0.414</b> | <b>0.97</b> | <b>0.94</b> | <b>1.00</b> | <b>0.027</b>                |
| 11q24.3                                                                         |                                    | <b>rs11820646</b> | <b>128966381</b> | T            | C            | <b>0.479</b> | <b>0.94</b> | <b>0.91</b> | <b>0.97</b> | <b>2.3x10<sup>-4</sup></b>  |
| 12p13.1                                                                         |                                    | <b>rs12422552</b> | <b>14305198</b>  | C            | G            | <b>0.344</b> | <b>1.05</b> | <b>1.02</b> | <b>1.09</b> | <b>0.005</b>                |
| 12q22                                                                           | <b>NTN4</b>                        | <b>rs17356907</b> | <b>94551890</b>  | G            | A            | <b>0.298</b> | <b>0.92</b> | <b>0.89</b> | <b>0.96</b> | <b>9.3x10<sup>-6</sup></b>  |
| 13q13.1                                                                         | <b>BRCA2,N4BP2L1</b>               | <b>rs11571833</b> | <b>31870626</b>  | T            | A            | <b>0.496</b> | <b>1.52</b> | <b>1.31</b> | <b>1.77</b> | <b>6.0x10<sup>-6</sup></b>  |
| 14q13.3                                                                         | <b>PAX9:SLC25A21</b>               | rs2236007         | 36202520         | A            | G            | 0.291        | 0.97        | 0.94        | 1.02        | 0.218                       |
| 14q24.1                                                                         | <b>RAD51L1</b>                     | rs2588809         | 67730181         | T            | C            | 0.248        | 1.00        | 0.96        | 1.05        | 0.940                       |
| 14q32.11                                                                        | <b>CCDC88C</b>                     | rs941764          | 90910822         | G            | A            | 0.415        | 1.03        | 0.99        | 1.06        | 0.117                       |
| 16q12.2                                                                         | <b>MIR1972-2:FTO</b>               | <b>rs17817449</b> | <b>52370868</b>  | G            | T            | <b>0.474</b> | <b>0.92</b> | <b>0.89</b> | <b>0.95</b> | <b>6.2x10<sup>-7</sup></b>  |
| 16q23.2                                                                         | <b>CDYL2</b>                       | rs13329835        | 79208306         | G            | A            | 0.223        | 1.02        | 0.98        | 1.06        | 0.269                       |
| 18q11.2                                                                         |                                    | <b>rs527616</b>   | <b>22591422</b>  | C            | G            | <b>0.447</b> | <b>0.95</b> | <b>0.92</b> | <b>0.99</b> | <b>0.006</b>                |
| 18q11.2                                                                         | <b>CHST9</b>                       | rs1436904         | 22824665         | G            | T            | 0.399        | 1.00        | 0.97        | 1.03        | 0.995                       |
| 19p13.11                                                                        | <b>SSBP4:ISYNA1:ELL</b>            | <b>rs4808801</b>  | <b>18432141</b>  | G            | A            | 0.349        | 0.93        | 0.90        | 0.96        | 5.1x10 <sup>-5</sup>        |
| 19q13.31                                                                        | <b>C19orf61:KCNN4:LYPD5:ZNF283</b> | <b>rs3760982</b>  | <b>48978353</b>  | A            | G            | <b>0.466</b> | <b>1.04</b> | <b>1.01</b> | <b>1.07</b> | <b>0.016</b>                |
| 22q12.2                                                                         | <b>EMID1:RHBDD3:EWSR1</b>          | rs132390          | 27951477         | C            | T            | 0.035        | 1.08        | 0.98        | 1.19        | 0.117                       |
| 22q13.1                                                                         | <b>MKL1</b>                        | <b>rs6001930</b>  | <b>39206180</b>  | C            | T            | <b>0.107</b> | <b>1.14</b> | <b>1.08</b> | <b>1.20</b> | <b>1.6x10<sup>-6</sup></b>  |

<sup>1</sup> rs2284378 at 20q11 previously reported by Siddiq, A. et al. (ref. 7) is not included because it was not well tagged in the iCOGS array used for BCAC replication.

## Supplementary Note

### *Consortia membership:*

**The GENICA Network** Dr. Margarete Fischer-Bosch-Institute of Clinical Pharmacology, Stuttgart and University of Tübingen, Germany (Christina Justenhoven, Hiltrud Brauch); Molecular Genetics of Breast Cancer, Deutsches Krebsforschungszentrum (DKFZ), Heidelberg, Germany (Ute Hamann); Department of Internal Medicine, Evangelische Kliniken Bonn gGmbH, Johanniter Krankenhaus, Bonn, Germany (Yon-Dschun Ko, Christian Baisch); Institute of Pathology, University of Bonn, Bonn, Germany (Hans-Peter Fischer); Institute for Prevention and Occupational Medicine of the German Social Accident Insurance (IPA), Bochum, Germany (Thomas Brüning, Beate Pesch, Sylvia Rabstein, Anne Lotz); Institute and Outpatient Clinic of Occupational Medicine, Saarland University Medical Center and Saarland University Faculty of Medicine, Homburg, Germany (Volker Harth).

**kConFab:** Heather Thorne, Eveline Niedermayr Pamela Provan, the AOCS Management Group (D Bowtell, G Chenevix-Trench, A deFazio, Do Gertig, A Green, P Webb), the ACS Management Group (A Green, P Parsons, N Hayward, P Webb, D Whiteman). Other kConFab members: David Amor, Lesley Andrews, Yoland Antill, Shane Armitage, Rosemary Balleine, Agnes Bankier, Patti Bastick, John Beilby, Barbara Bennett, Ian Bennett, Anneke Blackburn, Michael Bogwitz, Meagan Brennan, Melissa Brown, Michael Buckley, Matthew Burgess, Jo Burke, Phyllis Butow, Ian Campbell, Alice Christian, Christine Clarke, Alison Colley, Dick Cotton, Bronwyn Culling, Margaret Cummings, Sarah-Jane Dawson, , Martin Delatycki, Rebecca Dickson, AleTracy Dudding, Alexander Dobrovic, Tracy Dudding, Ted Edkins, Stacey Edwards, Gelareh Farshid, Susan Fawcett, Georgina Fenton, Michael Field, James Flanagan, Peter Fong, John Forbes, Stephen Fox, Juliet French, Clara Gaff, Mac Gardner, Mike Gattas, Graham Giles, Grantley Gill, Jack Goldblatt, Sian Greening, Scott Grist, Eric Haan, Marion Harris, Stewart Hart, Nick Hayward, Louise Heiniger, John Hopper, Clare Hunt, Paul James, Mark Jenkins, Rick Kefford, Alexa Kidd, Belinda Kiely, Judy Kirk, James Kollias, Jessica Koehler, Serguei Kovalenko, Sunil Lakhani, Jennifer Leary, Geoff Lindeman, Lara Lipton, Liz Lobb, Graham Mann, Deborah Marsh, Bettina Meiser, Roger Milne., Gillian Mitchell, Shona O'Connell, Nick Pachter, Briony Patterson, Lester Peters, Kelly Phillips, Melanie Price, Lynne Purser, Tony Reeve, Edwina Rickard, Bridget Robinson, Barney Rudzki, Elizabeth Salisbury, Christobel Saunders, Joe Sambrook, Jodi Saunus, Robyn Sayer, Clare Scott, Elizabeth Scott, Rodney Scott, Adrienne Sexton, Raghwa Sharma, Andrew Shelling, Peter Simpson, Melissa Southey, Amanda Spurdle, Graeme Suthers, Pamela Sykes, Jessica Taylor, Ella Thompson, Sharron Townshend, Alison Trainer, Kathy Tucker, Janet Tyler, Jane Visvader, Logan Walker, Paul Waring, Robin Ward, Bev Warner, Rachael Williams, Ingrid Winship, Mary Ann Young.

**The Familial Breast Cancer Study (FBCS):** Julian W Adlard (Yorkshire Regional Genetics Service, Chapel Allerton Hospital, Leeds), Julian Barwell (Leicestershire Genetics Centre, Leicester Royal Infirmary, Leicester), Jonathan Berg (Human genetics, Division of Medical Sciences, University of Dundee), Angela F Brady (NW Thames Regional Genetics Service, Kennedy Galton Centre, London), Carole Brewer (Peninsula Regional Genetics Service, Royal Devon & Exeter Hospital, Exeter), Glen Brice (SW Thames Regional Genetics Service, St George's Hospital, London), Cyril Chapman (West Midlands Regional Genetics Service, Birmingham Women's Hospital, Birmingham), Jackie Cook (Sheffield Regional Genetics Service, Sheffield Children's NHS Foundation Trust), Rosemarie Davidson (West of Scotland Regional Genetics Service, Laboratory Medicine, Southern General Hospital, Glasgow), Alan Donaldson (South Western Regional Genetics Service, University Hospitals of Bristol NHS Foundation Trust), Fiona Douglas (Northern Genetics Service, Newcastle upon Tyne Hospitals NHS Foundation Trust), Diana Eccles (Faculty of Medicine, University of Southampton, Southampton University Hospitals NHS Trust,), D. Gareth Evans (Genetic Medicine, Manchester Academic Health Science Centre, St. Mary's Hospital, Manchester), Lynn Greenhalgh (Merseyside and Cheshire Clinical Genetics Service, Liverpool Women's NHS Foundation Trust, Liverpool), Helen Hanson (Dept of Cancer Genetics, Royal Marsden NHS Foundation Trust, Sutton), Alex Henderson (Northern Genetics Service Cumbria), Louise Izatt (SE Thames Regional Genetics Service, Guy's and St Thomas NHS Foundation Trust, London), Ajith Kumar (NE Thames Regional Genetics Service, Great Ormond St Hospital, London), Fiona Lalloo (University Dept of Medical Genetics & Regional Genetics Service, St Mary's Hospital, Manchester), Zosia Miedzybrodzka (University of Aberdeen and North of Scotland Clinical Genetics Service, Aberdeen Royal Infirmary), Patrick J Morrison (Northern Ireland Regional Genetics Service, Belfast HSC Trust, Department of Medical Genetics, Queen's University Belfast), Joan Paterson (East Anglian Regional Genetics Service, Cambridge University Hospitals NHS Foundation Trust), Mary Porteous (South East of Scotland Clinical Genetics Service, Western General Hospital, Edinburgh), Mark T Rogers (All Wales Medical Genetics Service, University Hospital of Wales, Cardiff), Lisa Walker (Oxford Regional Genetics Service, Oxford University Hospitals NHS Trust, Oxford).

### *Acknowledgements*

**ABCFS:** Maggie Angelakos, Judi Maskiell, Gillian Dite. The ABCFS was supported by the United States National Cancer Institute, National Institutes of Health (NIH) under RFA-CA-06-503 and through cooperative agreements with members of the Breast Cancer Family Registry (BCFR) and Principal Investigators, including Cancer Care Ontario (U01 CA69467), Cancer Prevention Institute of California (U01 CA69417), Columbia University (U01 CA69398), Fox Chase Cancer Center (U01 CA69631), Huntsman Cancer Institute (U01 CA69446), and University of Melbourne (U01 CA69638). The content of this manuscript does not necessarily reflect the views or policies of the National Cancer Institute or any of the collaborating centers in the BCFR,

nor does mention of trade names, commercial products, or organizations imply endorsement by the US Government or the BCFR. The ABCFS was also supported by the National Health and Medical Research Council of Australia, the New South Wales Cancer Council, the Victorian Health Promotion Foundation (Australia) and the Victorian Breast Cancer Research Consortium. J.L.H. is a National Health and Medical Research Council (NHMRC) Australia Fellow and a Victorian Breast Cancer Research Consortium Group Leader. M.C.S. is a NHMRC Senior Research Fellow and a Victorian Breast Cancer Research Consortium Group Leader.

**ABCS:** Sten Cornelissen, Richard van Hien, Linde Braaf, Frans Hogervorst, Senno Verhoef, van der Schoot, Femke Atsma. The ABCS study was supported by the Dutch Cancer Society [grants NKI 2007-3839; 2009 4363]; BBMRI-NL, which is a Research Infrastructure financed by the Dutch government (NWO 184.021.007); and the Dutch National Genomics Initiative.

**ABCTB:** supported by the National Health and Medical Research Council of Australia, the Australian National Breast Cancer Foundation and the Cancer Institute NSW.

**ACP:** participants in the Thai Breast Cancer study. Special Thanks also go to the Thai Ministry of Public Health (MOPH), doctors and nurses who helped with the data collection process. Finally, the study would like to thank Dr Prat Boonyawongviroj, the former Permanent Secretary of MOPH and Dr Pornthep Siriwanarungsan, the Department Director-General of Disease Control who have supported the study throughout. . The ACP study is funded by the Breast Cancer Research Trust, UK.

**BBCC.** : Sonja Oeser, Silke Landrith. BBCC was partly funded by ELAN-Fond of the University Hospital of Erlangen.

**BBCS:** Eileen Williams, Elaine Ryer-Mills, Kara Sargus, . The BBCS is funded by Cancer Research UK and Breakthrough Breast Cancer and acknowledges NHS funding to the NIHR Biomedical Research Centre, and the National Cancer Research Network (NCRN).

**BIGGS:** Niall McInerney, Gabrielle Colleran, Andrew Rowan, Angela Jones  
**ES:** is supported by NIHR Comprehensive Biomedical Research Centre, Guy's & St. Thomas' NHS Foundation Trust in partnership with King's College London, United Kingdom. IT is supported by the Oxford Biomedical Research Centre.

**BSUCH:** Peter Bugert, Medical Faculty Mannheim . The BSUCH study was supported by the Dietmar-Hopp Foundation, the Helmholtz Society and the German Cancer Research Center (DKFZ).

**CECILE:** funded by Fondation de France, Institut National du Cancer (INCa), Ligue Nationale contre le Cancer, Ligue contre le Cancer Grand Ouest, Agence Nationale de Sécurité Sanitaire (ANSES), Agence Nationale de la Recherche (ANR).

**CGEMS:** funded by Intramural Research Funds of the National Cancer Institute, Department of Health and Human Services, USA.

**CGPS:** staff and participants of the Copenhagen General Population Study. For the excellent technical assistance: Dorthe Uldall Andersen, Maria Birna Arnadóttir, Anne Bank, Dorthe Kjeldgård Hansen. The CGPS was supported by the Chief Physician Johan Boserup and Lise Boserup Fund, the Danish

Medical Research Council and Herlev Hospital.

**CNIO-BCS:** Charo Alonso, Guillermo Pita, Nuria Álvarez, Daniel Herrero, Primitiva Menendez, José Ignacio Arias Pérez, Pilar Zamora, the Human Genotyping-CEGEN Unit (CNIO). The CNIO-BCS was supported by the Genome Spain Foundation, the Red Temática de Investigación Cooperativa en Cáncer and grants from the Asociación Española Contra el Cáncer and the Fondo de Investigación Sanitario (PI11/00923 and PI081120). The Human Genot.

**Coetzee Laboratory:** supported by NIH (R01 CA136924 to GA

**CTS:** supported by the California Breast Cancer Act of 1993; National Institutes of Health (grants R01 CA77398 and the Lon V Smith Foundation [LVS39420].); and the California Breast Cancer Research Fund (contract 97-10500). Collection of cancer incidence data used in this study was supported by the California Department of Public Health as part of the statewide cancer reporting program mandated by California Health and Safety Code Section 103885.

**DEMOKRITOS:** The study was supported by the Operational Program “Education & Lifelong Learning” ESPA-THALIS-TNBC#266 of the Greek Ministry of Education, Lifelong Learning & Religious Affairs.

**ESTHER:** Hartwig Ziegler, Sonja Wolf, Volker Hermann. The ESTHER study was supported by a grant from the Baden Württemberg Ministry of Science, Research and Arts. Additional cases were recruited in the context of the VERDI study, which was supported by a grant from the German Cancer Aid (Deutsche Krebshilfe).

**FBCS:** The Wellcome Trust Case Control Consortium (see the WTCCC website for a full list of contributing investigators). The FBCS is supported by funds from Cancer Research UK (C8620/A8372 and C8620/A8857), a US Military Acquisition (ACQ) Activity, Era of Hope Award (W81XWH-05-1-0204) and the Institute of Cancer Research (UK). C.T. is funded by a Medical Research Council (UK) Clinical Research Fellowship. The FBCS acknowledges NHS funding to the Royal Marsden / Institute of Cancer Research NIHR Specialist Cancer Biomedical Research Centre.

**FCCC:** support from The University of Kansas Cancer Center and the Kansas Bioscience Authority Eminent Scholar Program. A.K.G. was funded by 5U01CA113916, CA140323, RR033179/RR033177/RR033178 and by the Chancellors Distinguished Chair in Biomedical Sciences Professorship.

**GC-HBOC:** Heide Hellebrand, Stefanie Engert and GC-HBOC (Supported by Deutsche Krebshilfe). The GC-HBOC was supported by Deutsche Krebshilfe (107 352).

**GENICA:** The GENICA was funded by the Federal Ministry of Education and Research (BMBF) Germany grants 01KW9975/5, 01KW9976/8, 01KW9977/0 and 01KW0114, the Robert Bosch Foundation, Stuttgart, Deutsches Krebsforschungszentrum (DKFZ), Heidelberg, Institute for Prevention and Occupational Medicine of the German Social Accident Insurance (IPA), Bochum, as well as the Department of Internal Medicine, Evangelische Kliniken Bonn gGmbH, Johanniter Krankenhaus, Bonn, Germany.

**GESBC:** Ursula Eilber, Tanya Koehler. The GESBC was supported by the Deutsche Krebshilfe e. V. [70492] and genotyping in part by the state of

Baden-Württemberg through the Medical Faculty of the University of Ulm [P.685].

**HABCS:** Michael Bremer. The HABCS study was supported by an intramural grant from Hannover Medical School

**HEBCS:** Dr. Karl von Smitten and Dr. Kirsimari Aaltonen and RN Irja Erkkilä. The HEBCS was financially supported by the Helsinki University Central Hospital Research Fund, Academy of Finland (132473), the Finnish Cancer Society, The Nordic Cancer Union and the Sigrid Juselius Foundation.

**HERPACC:** supported by a Grant-in-Aid for Scientific Research on Priority Areas and on Innovative Area from the Ministry of Education, Science, Sports, Culture and Technology of Japan and by a Grant-in-Aid for the Third Term Comprehensive 10-Year Strategy for Cancer Control from Ministry Health, Labour and Welfare of Japan.

**HMBCS:** Peter Hillemanns, Hans Christiansen and Johann H. Karstens. The HMBCS was supported by a grant from the Friends of Hannover Medical School and by the Rudolf Bartling Foundation.

**HUBCS:** supported by a grant from the German Federal Ministry of Research and Education (RUS08/017).

**KARBAC:** The KARBAC study was supported by the Swedish Cancer Society, the Gustav V Jubilee Foundation and the Bert von Kantzow foundation.

**KBCP:** Eija Myöhänen, Helena Kemiläinen. The KBCP was financially supported by the special Government Funding (EVO) of Kuopio University Hospital grants, Cancer Fund of North Savo, the Finnish Cancer Organizations, the Academy of Finland and by the strategic funding of the University of Eastern Finland.

**kConFab/AOCS:** kConFab is supported by grants from the National Breast Cancer Foundation, the NHMRC, the Queensland Cancer Fund, the Cancer Councils of New South Wales, Victoria, Tasmania and South Australia and the Cancer Foundation of Western Australia. The kConFab Clinical Follow Up Study was funded by the NHMRC [145684, 288704, 454508]. Financial support for the AOCS was provided by the United States Army Medical Research and Materiel Command [DAMD17-01-1-0729], the Cancer Council of Tasmania and Cancer Foundation of Western Australia and the NHMRC [199600]. G.C.T. and P.W. are supported by the NHMRC. RB was a Cancer Institute NSW Fellow.

**LMBC:** Gilian Peuteman, Dominiek Smeets, Thomas Van Brussel and Kathleen Corthouts . LMBC is supported by the 'Stichting tegen Kanker' (232-2008 and 196-2010). Diether Lambrechts is supported by the FWO and the KULPFV/10/016-SymBioSysII.

**MARIE:** Thomas Illig, Kirsten Mittelstraß for their valuable contributions to analysis and generation of the GWAS data, and S. Behrens, U. Eilber, and B. Kaspereit for their excellent technical assistance. The MARIE study was supported by the Deutsche Krebshilfe e.V. [70-2892-BR I], the Hamburg Cancer Society, the German Cancer Research Center and the GWAS by the Federal Ministry of Education and Research (BMBF) Germany [01KH0402, 01KH0408, 01KH0409].

**MBCSG:** Siranoush Manoukian and Daniela Zaffaroni of the Fondazione

Istituto Nazionale Tumori, Milan, Italy, Monica Barile and Bernardo Bonanni of the Istituto Europeo di Oncologia, Milan, Italy and the personnel of the CGT laboratory at IFOM-IEO Campus, Milan, Italy. MBCSG was funded by grants from Fondazione Italiana per la Ricerca sul Cancro (Special Project “Hereditary tumors”), Italian Association for Cancer Research (AIRC, IG 8713), Italian Ministry of Health (“Progetto Tumori Femminili”), and by Italian citizens who allocated the 5x1000 share of their tax payment in support of the Fondazione IRCCS Istituto Nazionale Tumori, according to Italian laws (INT-Institutional strategic projects ‘5x1000’).

**MBCS:** supported by the NIH grants [CA122340, CA128978], an NIH Specialized Program of Research Excellence (SPORE) in Breast Cancer [CA116201], the Breast Cancer Research Foundation, and the Komen Race for the Cure.

**MCCS:** study recruitment was funded by VicHealth and Cancer Council Victoria. The MCCS was further supported by Australian NHMRC grants 209057, 251553 and 504711 and by infrastructure provided by Cancer Council Victoria.

**MEC:** support by NIH grants CA63464, CA54281, CA098758 and CA132839.

**MTLGBCS:** Martine Tranchant (Cancer Genomics Laboratory, CRCHUQ), Marie-France Valois, Annie Turgeon and Lea Heguy (McGill University Health Center, Royal Victoria Hospital; McGill University) for DNA extraction, sample management and skillful technical assistance. This work was supported by the Quebec Breast Cancer Foundation. J.S. is Chairholder of the Canada Research Chair in Oncogenetics..

**MYBRCA:** Phuah Sze Yee, Peter Kang, Kang In Nee, Kavitta Sivanandan, Shivaani Mariapun, Norhashimah Hassan, Yoon Sook-Yee, Teh Yew Ching, Ng Char Hoong. MYBRCA is funded by research grants from the Malaysian Ministry of Science, Technology and Innovation (MOSTI), Malaysian Ministry of Higher Education (UM.C/HIR/MOHE/06) and Cancer Research Initiatives Foundation (CARIF). Additional controls were recruited by the Singapore Eye Research Institute, which was supported by a grant from the Biomedical Research Council (BMRC08/1/35/19<tel:08/1/35/19>/550), Singapore and the National medical Research Council, Singapore (NMRC/CG/SERI/2010)

**NBCS:** supported by grants from the Norwegian Research council, 155218/V40, 175240/S10 to ALBD, FUGE-NFR 181600/V11 to VNK and a Swizz Bridge Award to ALBD.

**NBHS:** study participants and research staff for their contributions and commitment to this study. The NBHS was supported by NIH grant R01CA100374. Biological sample preparation was conducted the Survey and Biospecimen Shared Resource, which is supported by P30 CA68485.

**NC-BCFR:** See ABCFS.

**NHS:** funded by NIH grant CA87969.

**OBCS:** Meeri Otsukka, Kari Mononen, Mervi Grip. The OBCS was supported by research grants from the Finnish Cancer Foundation, the Academy of Finland, the University of Oulu, and the Oulu University Hospital.

**OFBCR:** Teresa Selander, Nayana Weerasooriya. SEE ABCFS.

**ORIGO:** E. Krol-Warmerdam, and J. Blom for patient accrual, administering questionnaires, and managing clinical information. The LUMC survival data



were retrieved from the Leiden hospital-based cancer registry system (ONCDOC) with the help of Dr. J. Molenaar.. The ORIGO study was supported by the Dutch Cancer Society (RUL 1997-1505) and the Biobanking and Biomolecular Resources Research Infrastructure (BBMRI-NL CP16).

**OSU:** Human Genetics Sample Bank for processing of samples. OSU Control specimens were provided by the Ohio State University's Human Genetics Sample Bank. The OSU was funded by the Stefanie Spielman fund and the OSU Comprehensive Cancer Center.

**PBCS:** Louise Brinton, Neonila Szeszenia-Dabrowska, Beata Peplonska, Witold Zatonski, Pei Chao, Michael Stagner. The PBCS was funded by Intramural Research Funds of the National Cancer Institute, Department of Health and Human Services, USA.

**pKARMA:** supported by Märít and Hans Rausings Initiative Against Breast Cancer, and Cancer Risk Prediction Center, a Linneus Centre (contract 70867902) financed by the Swedish Research Council.

**POSH:** POSH thanks Nikki Graham. The POSH study has been funded by consecutive grants from CRUK (C1275-A11699 and C1275 A7572) and the pathology sub-study by Breast Cancer Campaign grant 2005Nov53.

**RBCS:** Petra Bos, Jannet Blom, Ellen Crepin, Elisabeth Huijskens, Annette Heemskerk, the Erasmus MC Family Cancer Clinic. The RBCS was funded by the Dutch Cancer Society (DDHK 2004-3124, DDHK 2009-4318).

**SASBAC:** supported by funding from the Agency for Science, Technology and Research of Singapore (A\*STAR), the US National Institute of Health (NIH) and the Susan G. Komen Breast Cancer Foundation.

**SBCGS:** study participants and research staff for their contributions and commitment to this study. . The SBCGS was supported primarily by NIH grants R01CA64277, R01CA148667, and R37CA70867. Biological sample preparation was conducted the Survey and Biospecimen Shared Resource, which is supported by P30 CA68485.

**SBCS:** Sue Higham, Helen Cramp, and Dan Connley . The SBCS was supported by Yorkshire Cancer Research S295, S299, S305PA

**SCCS:** supported by a grant from the National Institutes of Health (R01 CA092447). Data on SCCS cancer cases used in this publication were provided by the Alabama Statewide Cancer Registry; Kentucky Cancer Registry, Lexington, KY; Tennessee Department of Health, Office of Cancer Surveillance; Florida Cancer Data System; North Carolina Central Cancer Registry, North Carolina Division of Public Health; Georgia Comprehensive Cancer Registry; Louisiana Tumor Registry; Mississippi Cancer Registry; South Carolina Central Cancer Registry; Virginia Department of Health, Virginia Cancer Registry; Arkansas Department of Health, Cancer Registry, 4815 W. Markham, Little Rock, AR 72205. The Arkansas Central Cancer Registry is fully funded by a grant from National Program of Cancer Registries, Centers for Disease Control and Prevention (CDC). Data on SCCS cancer cases from Mississippi were collected by the Mississippi Cancer Registry, which participates in the National Program of Cancer Registries (NPCR) of the Centers for Disease Control and Prevention (CDC). The contents of this publication are solely the responsibility of the authors and do not necessarily represent the official views of the CDC or the Mississippi

Cancer Registry.

**RPCI:** The RPCI was supported by National Institutes of Health grant P30 CA016056-32).

**SEARCH:** SEARCH and EPIC teams. SEARCH is funded by a programme grant from Cancer Research UK [C490/A10124].

**SEBCS:** supported by the Korea Health 21 R&D Project [AO30001], Ministry of Health and Welfare, Republic of Korea.

**SGBCC:** SGBCC is funded by the National Medical Research Council start-up Grant and Centre Grant (NMRC/CG/NCIS /2010). Additional controls were recruited by the Singapore Consortium of Cohort Studies-Multi-ethnic cohort (SCCS-MEC), which was funded by the Biomedical Research Council, grant number: 05/1/21/19/425.

**SKKDKFZS:** supported by the DKFZ, Heidelberg, Germany.

**SZBCS:** supported by Grant PBZ\_KBN\_122/P05/2004; Katarzyna Jaworska is a fellow of International PhD program, Postgraduate School of Molecular Medicine, Warsaw Medical University, supported by the Polish Foundation of Science.

**TBCS:** funded by The National Cancer Institute Thailand

**TWBCS:** supported by the Taiwan Biobank project of the Institute of Biomedical Sciences, Academia Sinica, Taiwan.

**UCIBCS.** Irene Masunaka . The UCIBCS component of this research was supported by the NIH [CA58860, CA92044] and the Lon V Smith Foundation [LVS39420].

**UKBGS:** Breakthrough Breast Cancer and the Institute of Cancer Research for support and funding of the Breakthrough Generations Study, and the study participants, study staff, and the doctors, nurses and other health care providers and health information sources who have contributed to the study . The UKBGS is funded by Breakthrough Breast Cancer and the Institute of Cancer Research (ICR). ICR acknowledges NHS funding to the NIHR Biomedical Research Centre.

**CRI:** Cancer Research UK programme grant.

**Genome Quebec:** staff of the genotyping unit under the supervision of Dr. Sylvie LaBoissière as well as Frédérick Robidoux from the McGill University and Génome Québec Innovation Centre.

**MEC:** supported by a Department of Defense Breast Cancer Research Program Era of Hope Scholar Award to CAH and the Norris Foundation. MEC was supported by National Institutes of Health grants R01-CA63464 and R37-CA54281.

**CARE:** supported by National Institute for Child Health and Development grant NO1-HD-3-3175, K05 CA136967.

**WCHS:** supported by U.S. Army Medical Research and Material Command (USAMRMC) grant DAMD-17-01-0-0334, the National Institutes of Health grant R01-CA100598, and the Breast Cancer Research Foundation.

**CBCS:** supported by National Institutes of Health Specialized Program of Research Excellence in Breast Cancer, grant number P50-CA58223, and Center for Environmental Health and Susceptibility National Institute of Environmental Health Sciences, National Institutes of Health, grant number P30-ES10126.

**PLCO:** supported by the Intramural Research Program, National Cancer Institute, National Institutes of Health.

**WFBC:** supported by National Institutes of Health grant R01-CA73629.

**NBH:** supported by National Institutes of Health grant R01-CA100374.

**SFBCS:** supported by National Institutes of Health grant R01-CA77305 and United States Army Medical Research Program grant DAMD17-96-6071.

**NC-BCFR:** support by National Institutes of Health grant U01-CA69417. The Breast Cancer Family Registry (BCFR) was supported by the National Cancer Institute, National Institutes of Health under RFA-CA-06-503 and through cooperative agreements with members of the Breast Cancer Family Registry and Principal Investigators. The content of this manuscript does not necessarily reflect the views or policies of the National Cancer Institute or any of the collaborating centers in the BCFR, nor does mention of trade names, commercial products, or organizations imply endorsement by the U.S. Government or the BCFR.
